1 **Enhanced Production of Mesencephalic Dopaminergic Neurons from Lineage-Restricted**  
2 **Human Undifferentiated Stem Cells.**

3

4 Muesier Maimaitili<sup>1,2,†</sup>, Muwan Chen<sup>1,2,†</sup>, Fabia Febbraro<sup>2,3</sup>, Noémie Mermet-Joret<sup>1,4</sup>,  
5 Johanne Lauritsen<sup>1,2</sup>, Ekin Ucuncu<sup>1,2</sup>, Ida Hyllen Klæstrup<sup>1,2</sup>, Per Qvist<sup>2,5,6,7</sup>, Sadegh Nabavi<sup>1,4</sup>,  
6 Marina Romero-Ramos<sup>1,2</sup>, Mark Denham<sup>1,2,\*</sup>

7

8 Author affiliation and information:

9 1. Danish Research Institute of Translational Neuroscience (DANDRITE), Nordic EMBL Partnership for Molecular  
10 Medicine, Aarhus University, 8000C Aarhus, Denmark

11

12 2. Department of Biomedicine, Aarhus University, 8000C Aarhus, Denmark

13

14 3. Department of Clinical Medicine, Aarhus University, 8000C Aarhus, Denmark

15

16 4. Department of Molecular Biology and Genetics, Aarhus University, 8000C Aarhus, Denmark

17

18 5. Lundbeck Foundation Initiative for Integrative Psychiatric Research, iPSYCH, 8000C Aarhus, Denmark

19

20 6. Centre for Integrative Sequencing, iSEQ, Aarhus University, 8000C Aarhus, Denmark

21

22 7. Centre for Genomics and Personalized Medicine, CGPM, Aarhus University, 8000C Aarhus, Denmark

23

24 † These authors contributed equally to this work

25

26 \* Corresponding Author: Mark Denham, Ph.D., Danish Research Institute of Translational Neuroscience, Aarhus  
27 University, 8000 Aarhus C, Denmark. Telephone: +4523982078; email: mden@dandrite.au.dk

28

29

30 **Abstract**

31 The differentiation of human pluripotent stem cells (hPSCs) into mesencephalic dopaminergic  
32 (mesDA) neurons requires a precise combination of extrinsic factors that recapitulates the *in*  
33 *vivo* environment and timing. Current methods are capable of generating authentic mesDA  
34 neurons after long-term culture *in vitro*; however, when mesDA progenitors are transplanted  
35 *in vivo*, the resulting mesDA neurons are only minor components of the graft. This low yield  
36 hampers the broad use of these cells in the clinic. In this study, we genetically modified  
37 pluripotent stem cells to generate a novel type of stem cells called lineage-restricted  
38 undifferentiated stem cells (LR-USCs), which robustly generate mesDA neurons. LR-USCs are  
39 prevented from differentiating into a broad range of nondopaminergic cell types by knocking  
40 out genes that are critical for the specification of cells of alternate lineages. Specifically, we  
41 target transcription factors involved in the production of spinal cord and posterior hindbrain  
42 cell types. When LR-USCs are differentiated under caudalizing condition, which normally give  
43 rise to hindbrain cell types, a large proportion adopt a midbrain identity and develop into  
44 authentic mesDA neurons. We show that the mesDA neurons are electrophysiologically  
45 active, and due to their higher purity, are capable of restoring motor behavior eight weeks  
46 after transplantation into 6-hydroxydopamine (6-OHDA)-lesioned rats. This novel strategy  
47 improves the reliability and scalability of mesDA neuron generation for clinical use.

48

## 49 Introduction

50

51 Mesencephalic dopaminergic (mesDA) neurons develop from the ventral midbrain of  
52 the neural tube. The morphogen sonic hedgehog (SHH) and members of the WNT family are  
53 instrumental in their specification due to their essential role in establishing the dorsal-ventral  
54 and anterior-posterior (A-P) axes of the embryo, respectively <sup>1,2</sup>. For the production of  
55 midbrain dopaminergic (DA) neurons, high SHH signaling from the notochord is required to  
56 specify ventral neural epithelial cells in the neural plate to a floor plate identity <sup>3</sup>, and graded  
57 Wnt signaling emanating from the posterior regions of the embryo is required to specify  
58 anterior neuroectoderm to a midbrain identity <sup>4</sup>. At later stages in development, neural  
59 progenitors in the midbrain region receive Wnt1 and Fgf8 signals from the isthmic organizer,  
60 which refines the patterning of the cells to a caudal location within the mesencephalon <sup>5,6</sup>.  
61 Recapitulating these developmental steps *in vitro* with human pluripotent stem cells (hPSCs)  
62 is the goal of stem cell transplantation therapies for Parkinson's disease <sup>7</sup>.

63 In stem cell differentiation protocols, early application of high concentrations of SHH  
64 is necessary to specify neural progenitor cells to a floor plate identity <sup>8,9</sup>. However, along the  
65 A-P axis (also referred to as rostral-caudal axis), specification to a caudal midbrain identity is  
66 more complex. A titrated WNT concentration within a precise range can specify anterior  
67 neuroectoderm progenitors to a caudal midbrain identity <sup>10,11</sup>. High concentrations result in  
68 the production of hindbrain cell types, and lower concentrations result in an anterior midbrain  
69 or diencephalic identity. Timed delivery of FGF8 or sequential exposure to high levels of WNT  
70 has also been shown to improve specification to a caudal midbrain identity <sup>12,13</sup>. Despite these  
71 advances in stem cell differentiation protocols, the overall yield of mesDA neurons after  
72 transplantation is extremely low, and increasing the yield would significantly improve cell  
73 purity and the reliability of graft function, which is essential for the use of these cells in the  
74 clinic <sup>14,15</sup>.

75 Downstream of extrinsic signaling, progenitor cells employ gene regulatory networks  
76 (GRNs) to interpret morphogen gradients and regulate cell fate <sup>16</sup>. During neural tube  
77 development, Otx2 is expressed in anterior regions, whereas Gbx2 is expressed in posterior  
78 regions at early stages of development. The midbrain-hindbrain boundary demarcates the  
79 Otx2 and Gbx2 boundary and the location of the isthmic organizer <sup>6</sup>. At this border, Otx2 and  
80 Gbx2 establish a separate network of transcription factors that maintain the position of the

81 isthmus organizer and assist in patterning the surrounding region <sup>5,17,18</sup>. Alterations in the  
82 expression levels of transcription factors in networks can result in the expansion or loss of  
83 specific brain regions <sup>19</sup>.

84 Transcription factor networks have been altered by forced expression of lineage-  
85 determinant transcription factors, such as *Lmx1a*, to accelerate the differentiation of mouse  
86 embryonic stem cells (ESCs) and human embryonic stem cells (hESCs) into DA cells <sup>20,21</sup>, and  
87 forced expression of *GLI1* in human ESC-derived neural progenitors can generate floor plate  
88 cells <sup>22</sup>. Conversely, in developing embryos, ablation of transcription factors can result in the  
89 loss of specific cell populations. Along the A-P axis, deletion of *Otx2* in embryos results in the  
90 loss of forebrain and midbrain structures <sup>23,24</sup>. Null mutations in all three *Cdx* family members  
91 result in the loss of spinal cord cell types below the preoccipital level due to disruption of  
92 central and posterior *Hox* gene expression and prevention of neuromesodermal progenitor  
93 (NMP) formation <sup>25-27</sup>. Interestingly, null mutations in *Gbx2* result in expansion of the midbrain  
94 at the expense of rhombomeres (r)1-3 <sup>28</sup>. These studies demonstrate that ablation of  
95 transcription factors that control cell fate can lead to the activation of altered GRNs and the  
96 respecification or expansion of alternate populations. It is therefore possible that  
97 transcription factor determinants in GRNs that are involved in lineage choices can be  
98 disrupted to control cell fate and bias the differentiation of hPSCs toward a mesencephalic  
99 neuron identity.

100 In this study, we used a gene knockout approach to restrict cell fate and prevent the  
101 differentiation of non-DA cell lineages with the aim of enhancing differentiation to mesDA  
102 neurons. Specifically, we focused on the early developmental stages when major lineage  
103 choices are made and identified the transcription factor determinants that are critical for  
104 those lineages but not required for a mesDA fate. By inducing loss-of-function mutations in  
105 lineage determinant genes expressed in non-DA lineages, we were able to bias the  
106 differentiation of hPSCs toward a mesDA identity. We generated stem cells that could be  
107 expanded in the undifferentiated pluripotent state and were restricted in their potential when  
108 differentiated. We named these lineage-restricted undifferentiated stem cells (LR-USCs).  
109 Specifically, we focused on the A-P axis of the developing neural tube because mesDA  
110 progenitors require titrated expression of WNT and because regulating this axis would most  
111 benefit a mesDA neuron differentiation protocol. We examined transcription factors that  
112 regulate hindbrain and spinal cord cell fates. The anterior hindbrain has been shown to require

113 Gbx2, and the spinal cord is dependent on Cdx family members <sup>26,28</sup>. By ablating these genes,  
114 we increased the percentage of cells that adopted a midbrain identity and prevented  
115 specification to a spinal cord fate. Uniquely, LR-USCs generated mesDA neurons under  
116 unfavorable conditions, specifically high concentrations of WNT, which normally induce the  
117 generation of hindbrain and spinal cord cell types. Furthermore, we demonstrated that the  
118 mesDA neurons were functional and able to restore motor behavior in a rodent model of 6-  
119 hydroxydopamine (6-OHDA)-induced Parkinson's disease. Our results show that this approach  
120 can be successfully used to robustly generate functional mesDA neurons and that the  
121 development of these cells is less reliant on specific concentrations of extrinsic factors. This  
122 strategy significantly improves the reliability and scalability of mesDA neuron production for  
123 clinical use for cell transplantation.

124

125

## 126 Results

127

### 128 **Midbrain cell types are preferentially generated from PSCs containing homozygous null** 129 **mutations in *GBX2*, *CDX1*, *CDX2*, and *CDX4* under caudalizing conditions**

130 To restrict the differentiation of hPSCs and guide them toward a mesDA neuron  
131 identity, we introduced null mutations in transcription factors that regulate cell fate along the  
132 A-P axis. First, we investigated whether a homozygous null mutation in *GBX2* in hESCs (H9  
133 cells) results in an increase in the production of midbrain cell types when the cells are  
134 differentiated under conditions known to produce hindbrain and spinal cord cells. We  
135 generated a *GBX2*<sup>-/-</sup> hESC line by introducing indels into the coding sequence (Supplementary  
136 Fig. 1). In the undifferentiated state, the *GBX2*<sup>-/-</sup> cell line was morphologically indistinguishable  
137 from control hESCs and capable of differentiating into neural progenitors. Using our previously  
138 published protocol for generating caudal neural progenitors (CNPs)<sup>29</sup>, we differentiated *GBX2*<sup>-/-</sup>  
139 cells into CNPs for four days *in vitro* (DIV) and compared these cells to H9 (control) CNPs (Fig.  
140 1a-b). Indeed, when differentiated in the presence of a GSK3B inhibitor (GSK3i; CHIR99021) at  
141 a concentration known to give rise to hindbrain and spinal cord cells (3 μM), there was a small  
142 but significant increase in the expression of the forebrain/midbrain marker *OTX2* (LogFC to  
143 hESC = H9: 0.003; *GBX2*<sup>-/-</sup>: 0.083; P = 0.0005) (Fig. 1c) and a significant reduction in the  
144 transcript level of *CDX2* in the *GBX2*<sup>-/-</sup> cells compared to the H9 cells (LogFC to hESC = H9:  
145 8871.79; *GBX2*<sup>-/-</sup>: 3160.57; P = 0.006) (Fig. 1d). Despite the increase in *OTX2* expression, we  
146 observed few *OTX2*-positive cells, and almost all cells were *CDX2*-positive (Fig. 1b).

147 Based on the results obtained using the *GBX2*<sup>-/-</sup> line, we next attempted to further  
148 restrict the potential of cells along the A-P axis by knocking out *CDX* family members. *Cdx2* is  
149 an upstream regulator of central and posterior *Hox* genes and acts as a key determinant of  
150 spinal cord fate through its regulation of axial elongation<sup>25,30</sup>. Triple homozygous null  
151 mutations in all three *Cdx* genes (*Cdx1*, *Cdx2*, and *Cdx4*) result in severe truncation of the spinal  
152 cord below the postoccipital level and prevent the formation of NMPs<sup>26,27</sup>. Because loss of  
153 *Cdx1/2/4* in mice causes posterior truncation, we chose to disrupt the *CDX* family of genes in  
154 addition to knocking out *GBX2*. We generated homozygous null mutations in all three *CDX*  
155 family members, *CDX1/2/4*, by targeting their DNA binding domains (Supplementary Fig. 2).  
156 The resulting *GBX2*<sup>-/-</sup>*CDX1/2/4*<sup>-/-</sup> hESC line (hereafter referred to as 4X cells) was differentiated  
157 for four DIV using the CNP protocol (Fig. 1a). As expected, we did not detect *CDX2* transcripts

158 or CDX2 expression in 4X CNPs (Fig. 1b, d). Strikingly, at 4 DIV, the 4X neural progenitors  
159 showed a significant increase in *OTX2* transcript levels compared to H9 and *GBX2*<sup>-/-</sup> derived  
160 CNPs (LogFC to hESC = H9: 0.0032; *GBX2*<sup>-/-</sup>: 0.083; 4X: 0.301; P < 0.0001 for both 4X vs. H9 or  
161 *GBX2*<sup>-/-</sup>), and we could readily identify *OTX2*-positive cells (Fig. 1b, c).

162 To elucidate the effects on gene expression in more detail, we performed RNA  
163 sequencing on CNPs of all three cell lines (H9, *GBX2*<sup>-/-</sup> and 4X). We assessed *HOX* gene  
164 expression profiles and found that the 4X CNPs showed a significant reduction in the  
165 expression of posterior *HOX* genes, compared to H9, beginning with *HOXA3* and moving  
166 caudally (*HOXA3*, P = 1x10<sup>-6</sup>; *HOXA5*, P = 1.95x10<sup>-5</sup>; *HOXA7*, P = 0.0005; *HOXA9*, P = 0.0004;  
167 *HOXA10* P = 0.002; Fig. 1e). These results indicate that 4X cells were unable to generate  
168 progenitor cell types caudal to r4<sup>31</sup>. We next questioned whether there were changes in the  
169 expression of anterior genes. First, we examined the expression of forebrain genes in 4X CNPs  
170 and observed no change in the expression of *SIX3*, *DLX2* and *FOXP1* (Fig. 1e). However, the  
171 transcript levels of the forebrain/midbrain gene *OTX2* were significantly increased in 4X CNPs  
172 compared to H9 and *GBX2*<sup>-/-</sup> CNPs (H9, LogFC = 6.83, P = 0.001; *GBX2*<sup>-/-</sup>, LogFC = 3.92, P = 0.003,  
173 respectively). The expression of the midbrain genes *PAX2*, and *EN1* was also significantly  
174 increased in 4X CNPs compared to H9 (*PAX2*, LogFC = 2.63, P = 0.03; *EN1*, LogFC = 4.76, P =  
175 0.03) and *GBX2*<sup>-/-</sup> CNPs (*PAX2*, LogFC = 3.49, P = 0.00005; *EN1*, LogFC = 7.08, P = 0.0003; Fig.  
176 1e). Interestingly, *GBX2*<sup>-/-</sup> cells showed a reduction in the expression of anterior hindbrain  
177 genes, such as *EGR2* (LogFC = -3.86; also known as *KROX20*) and *MAFB* (LogFC = -0.67), which  
178 was in line with reports showing that disruption of *Gbx2* in mice causes loss of r1-3<sup>28</sup>. In  
179 contrast, the expression of *MAFB* significantly increased in 4X cells (*MAFB*, LogFC = 2.49, P =  
180 0.0002), which is in accordance with the loss of posterior *HOX* expression.

181 Analysis of differentially expressed genes among the three groups showed that the top  
182 significantly downregulated genes in 4X cells compared to H9 and *GBX2*<sup>-/-</sup> cells included *HOX*  
183 genes (Fig. 1f). Furthermore, the expression of *CYP26A1*, which is involved in retinoic acid (RA)  
184 metabolism and is induced by CDX2, was significantly downregulated in 4X cells compared to  
185 *GBX2*<sup>-/-</sup> cells (LogFC = -13.43, P = 1.30x10<sup>-12</sup>). A comparison of *GBX2*<sup>-/-</sup> to H9 cells showed that  
186 knockout of *GBX2* alone resulted in a significant decrease in the transcription levels of the  
187 Groucho corepressor proteins *TLE1* (LogFC = -2.86, P = 8.05x10<sup>-9</sup>) and *TLE4* (LogFC = -1.54, P =  
188 8.32x10<sup>-9</sup>), which function with *GBX2* to repress *OTX2*<sup>32</sup>. Overall, knockout of *GBX2* resulted  
189 in disruption of anterior hindbrain patterning, and 4X cells showed that further loss of CDX

190 family members caused a posterior limitation of the CNS equivalent of r4, which resulted in  
191 significantly higher expression of midbrain and anterior hindbrain genes (Fig. 1e, f).

192 To further explore the potential of the 4X cells, we extended the duration of  
193 differentiation to 11 DIV and added smoothened agonist (SAG) to ventralize the cells (Fig. 1g).  
194 We found that the transcript levels of *OTX2* were higher in the 4X cells than in the H9 and  
195 *GBX2*<sup>-/-</sup> cells, which was similar to what was observed after differentiation for 4 DIV, although  
196 at 11 DIV it was not significant (RNA count, H9: 20.0; *GBX2*<sup>-/-</sup>: 26.9; 4X: 114.3; P = 0.09 and P =  
197 0.12, respectively) (Fig. 1h). Furthermore, we found that the expression of the midbrain gene  
198 *PAX8* was significantly upregulated in 4X cells compared to H9 and *GBX2*<sup>-/-</sup> cells (RNA count,  
199 H9: 158.6; *GBX2*<sup>-/-</sup>: 414.4; 4X: 1813.0; P = 0.0007, P = 0.002, respectively) (Fig. 1h). The  
200 expression of *EN1*, which spans the caudal midbrain and r1 during development<sup>33</sup>, was also  
201 significantly upregulated in 4X cells compared to H9 and *GBX2*<sup>-/-</sup> cells (RNA count = H9: 66.6;  
202 *GBX2*<sup>-/-</sup>: 784.8; 4X: 2985.4; P = 0.003 and P = 0.01, respectively; Fig. 1h). The expression of  
203 hindbrain gene *EGR2*, which is expressed in r3 and r5<sup>34</sup>, was significantly upregulated (LogFC  
204 = H9: 0.33; *GBX2*<sup>-/-</sup>: 0.46; 4X: 1.88; P = 0.001 and P = 0.002, respectively; Fig. 1h), and the  
205 expression of *MAFB*, a marker of r5 and r6<sup>34</sup>, was not significantly altered.

206 Upon examination of *HOX* expression profiles, we found that central and posterior  
207 *HOX* genes beginning with *HOXA3* and moving posteriorly were absent in 4X cells (Fig. 1h).  
208 The expression of *HOXA2*, which is expressed throughout the hindbrain (except for r1), was  
209 maintained in the 11 DIV 4X CNPs; however, the expression of the anterior *HOX* genes *HOXB2*  
210 and *HOXB1* was significantly upregulated in 4X cells compared to H9 cells (LogFC = H9: 893.4;  
211 4X: 1893.3; P = 0.005 for *HOXB2*, and H9: 965.0; 4X: 22377.6; P = 0.0002 for *HOXB1*),  
212 suggesting a compensatory shift in the population to a more anterior identity (Fig. 1h).  
213 Immunocytochemical analysis confirmed the change that we observed at the transcript level  
214 (Fig. 1i). We identified caudal midbrain progenitors, i.e., *OTX2/EN1* double-positive cells,  
215 among 4X cells at 11 DIV, but such cells were not detected among H9 cells at 11 DIV (Fig. 1i).  
216 These results indicate that under caudalizing conditions, 4X cell did not produce spinal cord  
217 progenitors and showed a restricted *HOX* expression profile up to r4. Furthermore, the  
218 distribution of cell types was shifted anteriorly, as indicated by the presence of *OTX2/EN1*  
219 double-positive cells, which were not detected among H9 cells. These results support the  
220 notion that 4X cells preferentially adopt a midbrain or anterior hindbrain identity under  
221 conditions that usually give rise to caudal hindbrain and spinal cord cell types.



222

### 223 **LR-USCs efficiently generate caudal midbrain progenitors**

224 We next investigated how 4X cells respond when differentiated with a range of GSK3i  
225 concentrations and whether the enhanced specification of 4X cells to OTX2/EN1 double-  
226 positive midbrain cells at 3  $\mu$ M GSK3i is maintained at lower GSK3i concentrations. Using the  
227 same 11 DIV caudal protocol, we tested four concentrations of GSK3i from 0.7  $\mu$ M to 3  $\mu$ M  
228 (Fig. 2a-b). We examined the percentage of cells expressing OTX2 by flow cytometry.  
229 Strikingly, at the lowest concentrations of GSK3i, i.e., 0.7  $\mu$ M and 1  $\mu$ M, 71.0% and 34.9%,  
230 respectively, of 4X cells were OTX2-positive; there were significantly more OTX2-positive 4X  
231 cells than OTX2-positive H9 and GBX2<sup>-/-</sup> cells at these concentrations (H9: 2.5%; GBX2<sup>-/-</sup>:  
232 21.8%; 4X: 71.0% P < 0.0001 for both, for 0.7  $\mu$ M. H9: 4.8%; GBX2<sup>-/-</sup>: 5.0%; 4X: 34.9% P < 0.0001  
233 for both, for 1  $\mu$ M). At 2 - 3  $\mu$ M GSK3i, the percentage of OTX2-positive cells decreased  
234 dramatically in all groups; however, there were still more OTX2-positive 4X cells than OTX2-  
235 positive H9 and GBX2<sup>-/-</sup> cells at 3  $\mu$ M GSK3i (H9: 0.3%; GBX2<sup>-/-</sup>: 0.8%; 4X: 10.1% P < 0.0004 and  
236 P < 0.0008, respectively).

237 Our main objective was to generate LR-USCs that more efficiently generate mesDA  
238 neurons, even under suboptimal conditions. Thus, we compared H9 and 4X cells and  
239 differentiated them using a recently reported mesDA protocol (Fig. 2c)<sup>14</sup>. This protocol is  
240 known to require adjustments to the concentration of GSK3i between cell lines; therefore, we  
241 started by titrating GSK3i from a concentration of 0.5  $\mu$ M to 1  $\mu$ M to identify the optimal  
242 concentration for generating posterior midbrain cells from H9 cells. First, we determined that  
243 the highest percentage of OTX2-positive H9 cells was obtained with a concentration of GSK3i  
244 between 0.5 and 0.7  $\mu$ M and that there was a significant decrease in the number of these cells  
245 when the GSK3i concentration reached 1  $\mu$ M (Fig. 2d). Second, we examined the expression  
246 levels of midbrain genes (Fig. 2e). The transcript level of *OTX2* in H9 cells at 16 DIV reached a  
247 maximum at a GSK3i concentration of between 0.5 and 0.6  $\mu$ M, and *EN1* expression was the  
248 highest at a GSK3i concentration of 0.6  $\mu$ M. Furthermore, the transcript level of the hindbrain  
249 gene *HOXA2* reached the lowest point at a GSK3i concentration between 0.5 and 0.6  $\mu$ M.  
250 These results were consistent with previous reports, which indicated that a GSK3i  
251 concentrations below 1  $\mu$ M is necessary for midbrain specification and that concentrations  
252 approaching 1  $\mu$ M or higher result in a dramatic shift to hindbrain identity<sup>11</sup>. Interestingly,  
253 *HOXA2* was expressed under optimal conditions, demonstrating that the protocol resulted in

254 the production of a wide variety of cell types along the A-P axis, including hindbrain cell types,  
255 as reported by others<sup>11</sup>. Overall, we determined that the optimal GSK3i concentration for H9  
256 cells at 16 DIV was 0.6  $\mu$ M (Fig. 2d, e and Supplementary Fig. 3).

257 We next compared H9 cells and 4X cells across multiple GSK3i concentrations and  
258 observed a significant improvement in the ability of 4X cells to produce midbrain cells. 4X cells  
259 produced a significantly higher percentage of OTX2-positive cells than H9 cells across all GSK3i  
260 concentrations (H9: 37.0%, 4X: 86.2%,  $P < 0.0001$  at 0.5  $\mu$ M; H9: 41.1%, 4X: 91.3%,  $P < 0.0001$   
261 at 0.6  $\mu$ M; H9: 18.6%, 4X: 92.7%,  $P < 0.0001$  at 0.7  $\mu$ M; H9: 1.5%, 4X: 49.3%,  $P < 0.0001$  at 1  $\mu$ M;  
262 Fig. 2d). Furthermore, 4X cells exhibited significantly higher *OTX2* transcript levels than H9  
263 cells across all GSK3i concentrations tested ( $P = 0.02$  at 0.5  $\mu$ M,  $P < 0.0001$  at 0.6  $\mu$ M,  $P =$   
264  $0.0001$  at 0.7  $\mu$ M and  $P < 0.0001$  at 1  $\mu$ M; Fig. 2e) and *LMX1A* transcript levels are significantly  
265 higher than H9 cells at 0.6 and 0.7  $\mu$ M GSK3i ( $P < 0.0001$  at 0.6  $\mu$ M and  $P = 0.0001$  at 0.7  $\mu$ M;  
266 Fig. 2e). In addition, we assessed the expression of caudal midbrain markers and found that  
267 *EN1* expression was significantly higher in 4X cells than H9 cells at 0.7  $\mu$ M and 1  $\mu$ M GSK3i  
268 (LogFC = H9: 77198.6, 4X: 149418,  $P = 0.0002$  at 0.7  $\mu$ M and H9: 27018.2, 4X: 222563,  $P < 0.0001$   
269 at 1  $\mu$ M) and that *CNPY1* expression was significantly higher in 4X cells than H9 cells at 1  $\mu$ M  
270 GSK3i (LogFC = H9: 8.3, 4X: 73.4,  $P < 0.0001$ ). Immunofluorescence staining confirmed the  
271 above results and showed that there was an abundance of EN1-positive 4X cells at GSK3i  
272 concentrations from 0.6  $\mu$ M to 1  $\mu$ M, whereas EN1-positive H9 cells were prominent only at  
273 a GSK3i concentration of 0.6  $\mu$ M (Fig. 2f and Supplementary Fig. 3). These results  
274 demonstrated that 4X cells were more capable of generating caudal midbrain cells than H9  
275 cells, even when exposed to concentrations of GSK3i that usually lead to the generation of  
276 hindbrain cell types.

277

### 278 **LR-USCs differentiated under conditions that favor a hindbrain identity generate midbrain** 279 **progenitors**

280 Using single-cell sequencing, we determined the cell types that were produced by H9  
281 and 4X cells following the mesDA neuron differentiation protocol using 1  $\mu$ M of GSK3i.  
282 Dimension reduction was performed by uniform manifold approximation and projection  
283 (UMAP), and there was a noticeable separation between 4X and H9 cells across clusters (Chi-  
284 square,  $P < 0.0001$ ) and a difference in the cell types produced by the two cell lines at 16 DIV  
285 (Fig. 3a, d). This separation coincided with a marked shift in distribution along the A-P axis.

286 Based on the expression of *OTX2* and *EN1*, we divided the A-P axis into four domains (rostral,  
287 *OTX2*-positive/*EN1*-negative; caudal midbrain, *OTX2*-positive/*EN1*-positive; rhombomere 1,  
288 *OTX2*-negative/*EN1*-positive; and posterior, *OTX2*-negative/*EN1*-negative) (Fig. 3c). 4X cells  
289 produced all four populations, with the smallest being the most rostral population (Fig. 3c).  
290 The caudal midbrain is the region where DA neurons of the substantia nigra develop, and  
291 35.2% percent of 4X cells could be assigned to this region. Unlike for 4X cells, 0.6% of the cells  
292 produced by H9 expressing caudal midbrain markers and 97.5% of the cells were of the  
293 posterior population (*OTX2*-negative/*EN1*-negative; Fig. 3c, d). Overall, 4X cells preferentially  
294 generated *EN1*-positive cells (54.3%) spanning the midbrain and hindbrain, whereas the  
295 majority (97.5%) of H9 cells were classified as hindbrain cell types. Analysis of the ventral  
296 patterning gene *FOXA2* showed that it was highly expressed in both H9 and 4X cells, indicating  
297 that both cell lines were efficiently ventralized to a floor plate identity (Fig. 3d).

298 Upon further examination of caudal midbrain cells by graph-based clustering, we  
299 identified three clusters (clusters 1, 9, and 8) enriched in caudal midbrain floor plate  
300 progenitors expressing *FOXA2*, *OTX2*, *LMX1A* and *EN1* (Fig. 3a-d). Two additional midbrain  
301 floor plate clusters (clusters 6 and 10) were identified; these populations expressed *FOXA2*,  
302 *OTX2* and *EN1* but lacked *LMX1A*, indicating that they were a lateral floor plate population  
303 (Supplementary Fig. 4a). Clusters 8 and 6 were in a proliferative state, as revealed by the  
304 expression of *MKI67* and *TOP2A* (Fig. 3b). Cluster 1 was the largest midbrain population and  
305 exhibited the highest expression of midbrain markers, with 4X cells making up 98.6% of cells  
306 in this cluster.

307 By analyzing the hindbrain cells in more detail, we identified five clusters that we  
308 classified as hindbrain floor plate progenitors (clusters 0, 4, 2, 7, and 5), which expressed  
309 *FOXA2*, *SHH* and *CORIN* (Fig. 3b). The hindbrain floor plate clusters comprised both H9 and 4X  
310 cells (Fig. 3c). Further examination of *HOX* gene expression within these clusters showed that  
311 there was an abundance of cells expressing anterior *HOXA/B* genes (Fig. 3d). A total of 92.2%  
312 of the *HOXA/B* cells originated from H9 cells, confirming that H9 cells were of a more caudal  
313 identity than 4X cells (Fig. 3d and Supplementary Fig. 4b-c). We also identified a small  
314 population of early neural crest progenitors expressing *SOX10* and *FOXD3* (cluster 13), which  
315 were exclusively H9 cells (Fig. 3a, b).

316 By 16 DIV, three neuronal clusters (3, 11, and 12), which were predominately derived  
317 from H9 cells, were present (H9: 52%, 95%, 100%; 4X: 48%, 5%, 0%, respectively). Clusters 11

318 and 3 expressed high levels of *ONECUT2*, *PHOX2B* and *ISL1*, which are markers of early-born  
319 basal-plate hindbrain motor neurons<sup>35–37</sup>. The remaining cluster, cluster 12, contained only  
320 28 cells that expressed high levels of *GATA2*, *GATA3* and *MEIS2* but did not express *GAD1* or  
321 *GAD2*, indicating that they were immature V2b GABAergic neuroblasts<sup>36</sup>. A population of cells  
322 within the neuronal clusters expressed tyrosine hydroxylase (*TH*); however, after  
323 subclustering, we found that these cells did not express *NR4A2* (also known as *NURR1*), *LMX1A*  
324 or *EN1*, indicating that they were not of a mesDA identity (Fig. 3b, d and Supplementary Fig.  
325 4d, e).

326

### 327 **LR-USCs efficiently generate mesDA neurons under conditions that favor a hindbrain** 328 **identity**

329 To examine the extent to which midbrain floor plate progenitors can produce mesDA  
330 neurons, we extended the 1  $\mu$ M GSK3i protocol to 62 DIV. At 62 DIV, the two cell lines  
331 occupied almost completely separate clusters (Chi-square,  $P < 0.0001$ ; Fig. 3e, g). 4X cells were  
332 broadly be divided into two main cell types: hindbrain r1 floor plate clusters expressing *FOXA2*,  
333 *SHH*, *NETRIN1*, *SPON1* and *EN1* (clusters 4, 5 and 6)<sup>38</sup> and neuronal clusters (clusters 0 and 8;  
334 Fig. 3e, f). The neuronal clusters contained mesDA neurons identified by the expression of *TH*,  
335 *FOXA2*, *LMX1A* and *EN1* (Fig. 3f and Supplementary Fig. 4g). Clusters 0 and 8 was comprised  
336 almost entirely of 4X cells (4X: 82% and 77%, H9: 18% and 23%; Fig. 3e). Upon closer inspection  
337 of the difference between clusters 0 and 8, we identified a subset of cells within cluster 8 that  
338 expressed *NKX2.1*, a marker of hypothalamic neurons<sup>39</sup>.

339 In contrast to 4X cells, H9 cells formed one main connected set of clusters (clusters 1,  
340 2, 3, and 7) and two small isolated clusters (clusters 9 and 10; Fig 3e). All six clusters were  
341 dominated by cells expressing markers indicative of vascular leptomeningeal cells (VLMCs),  
342 i.e., *COL3A1*, *IFITM2* and *S100A11* (Fig. 3f). Interestingly, *EN1* was largely absent from the  
343 VLMC clusters (Fig. 3g). Cluster 7 also contained a population (41%) of cells expressing *STMN2*,  
344 *SEMA3C* and *PDLIM1* (Fig. 3f, Supplementary Fig. 4f), which, according to a single-cell brain  
345 atlas, corresponded to a subtype of peripheral sensory neurons<sup>40</sup>.

346 We next wanted to examine the subtypes of mesDA neurons by first subclustering of  
347 *TH*-positive neurons (Supplementary Fig. 4h-j). To distinguish between substantia nigra and  
348 ventral tegmental area (VTA) DA neurons, we assessed the expression of *GIRK2* (also known  
349 as *KCNJ6*) and CalbindinD (*CALB1*). *GIRK2* was highly expressed in the subclusters 1 and 3, and

350 accounted for 38% of the TH population, and only a small proportion of TH neurons expressed  
351 CALB1 (13.6%; Supplementary Fig. 4k).

352 To further support our single-cell sequencing results, histological analysis was  
353 performed. We used the same growth factor paradigm but adapted a differentiation protocol  
354 to generate organoids to provide an optimal environment for the survival of neurons (Fig. 4a).  
355 At 83 DIV, we observed a large population of FOXA2/TH double-positive DA neurons within  
356 organoids produced from 4X cells (Fig. 4b). In contrast, TH-positive cells were occasionally  
357 scattered throughout organoids produced by H9 cells; however, we rarely detected TH-  
358 positive cells coexpressing FOXA2 (Fig. 4b). These results were consistent with the histological  
359 analysis of our 2D cultures at 62 DIV (Supplementary Fig. 5). Further examination of TH-  
360 positive neurons showed that, in accordance with our single-cell data, the most abundant  
361 population of TH neurons derived from 4X cells coexpressed GIRK2 (Fig. 4b) and that there  
362 was a small population of CALB1/TH double-positive neurons (Fig. 4b).

363 According to the single-cell sequencing data, the majority of H9 cells were VLMCs  
364 (Clusters 1, 2, 3, 7, 9, 10; 93% of H9 cell). To confirm this finding, we examined the expression  
365 of VLMC markers in organoids at 83 DIV, and we identified a large population of  
366 COL3A1/COL1A1 double-positive cells with a nonneuronal morphology among H9 cells (Fig.  
367 4c). No cells positive for COL3A1 or COL1A1 were identified among 4X cells (Fig. 4c).

368

### 369 **DA neurons derived from LR-USCs exhibit pacemaker activity**

370 Having shown that we can generate mesDA neurons from 4X cells under caudalizing  
371 conditions, we next wanted to examine the electrophysiological properties of the DA neurons.  
372 We performed *in vitro* electrophysiological recordings in whole-cell patch-clamp configuration  
373 between DIV 80 and DIV 84 (Fig. 4d). We observed that the cells developed into  
374 electrophysiologically mature neurons, as measured by their ability to generate repetitive  
375 action potentials upon somatic current injection (Fig. 4e). Recordings in current-clamp mode  
376 revealed spontaneous pacemaker activity characteristic of a DA neuron identity, with a mix of  
377 single spikes and phasic bursts (Fig. 4f). Membrane oscillations collapsed at potentials below  
378 -50 mV (data not shown). The firing frequency in our sample ranged from 1 to 5 Hz (Fig. 4g).  
379 Furthermore, HPLC analysis of cell extracts showed that the DA content in the 4X cells was  
380 significantly higher than that in the H9 cells (287.4 nmol/g in 4X cells vs. 65.1 nmol/g in H9  
381 cells,  $P = 0.002$ ; Fig. 4h).

382

### 383 **Analysis of 4X cells *in vivo* in a Parkinson's disease rat model**

384         When using current DA neuron differentiation protocols, DA neurons account for only  
385 a small percentage of cells of the entire graft when mesDA progenitors are grafted *in vivo*. A  
386 protocol using FGF8 to induce midbrain caudalization was shown to result in the production  
387 of approximately 3,700 TH-positive DA cells per 100,000 grafted cells<sup>14</sup>, and a more recently  
388 reported protocol using a delayed boost of WNT was found to induce the generation of 9,173  
389 TH-positive cells per 6.22 mm<sup>3</sup> graft following transplantation of 450,000 cells<sup>13</sup>. We  
390 investigated how our 4X LR-USCs behave *in vivo* when transplanted into a rodent model of  
391 Parkinson's disease. To confirm the results of our single-cell analysis, we used the same  
392 midbrain differentiation protocol with an unfavorable caudalizing concentration of GSK3i (1  
393  $\mu$ M).

394         A total of 250,000 4X cells or H9 cells were transplanted into the striata of nude rats  
395 with 6-OHDA-induced medial forebrain bundle (MFB) lesions 4 weeks after lesioning. A third  
396 group of lesioned rats that did not undergo transplantation was used as a lesion control (6-  
397 OHDA, see Fig. 5a for study design). At the time of transplantation, all three groups of rats  
398 exhibited a similar number of amphetamine-induced ipsilateral rotations/min (limit for  
399 inclusion: 5 rotations/min, Supplementary Fig. 6a), confirming significant loss of DA striatal  
400 innervation. All three groups showed forelimb asymmetry in the cylinder test, with the rats  
401 using mostly the ipsilateral forepaw (6-OHDA 52.4%; H9 70.4% and 4X 67.4% of total) and  
402 almost never the contralateral forepaw (6-OHDA 1.3 %; H9 1.3% and 4X 0% of total) to touch  
403 the walls or land on the floor after rearing, further supporting the induction of a DA deficit by  
404 6-OHDA (Supplementary Fig. 6b).

405         Eight weeks posttransplantation, rats that received 4X cells showed complete  
406 correction of amphetamine-induced ipsilateral rotation (pretransplant: 10.6 vs 8w: 0.35  
407 rotations/min), suggesting that a sufficient amount of dopamine was released in the striatum  
408 to normalize (Fig. 5b) or even overcompensate for this behavior, as suggested by the number  
409 of contralateral rotations (-3.12 rotations/min) observed 18 weeks posttransplantation.  
410 However, H9 cells-transplanted rats presented a statistically similar number of ipsilateral  
411 rotations as the control 6-OHDA lesion group (pretransplant: 9.8; 8w: 9.7 and 18w: 9.2  
412 rotations/min) throughout the entire experiment, showing only a significant reduction in the  
413 number of rotations compared to pretransplantation values at 18 weeks (H9 pretransplant:



414 11.5; 8w: 12.6 and 18w: 5.6 rotations/min, Fig. 5b). Analysis of spontaneous motor behavior  
415 in the cylinder test confirmed the significant improvement in 4X cell-transplanted rats, as  
416 these rats used the contralateral forelimb alone (9.7% of total) or together with the ipsilateral  
417 forelimb (both 46.3%) during the test at week 18 (Fig. 5c). However, both H9 cell-transplanted  
418 and 6-OHDA lesion rats used mostly the ipsilateral forelimb (76.1% and 79.3% of total  
419 respectively), using both forelimbs less than 30% of the time but almost never using the  
420 contralateral impaired forelimb when rearing in the cylinder, as observed before  
421 transplantation (Fig. 5c). Therefore, 4X cell transplantation significantly improved both drug-  
422 induced and spontaneous motor behavior after 6-OHDA-induced lesioning of the MFB.

423 Postmortem histological analysis of the brains showed that rats transplanted with 4X  
424 cells had graft-derived TH-positive cells in the area of injection, i.e., the striatum, as well as in  
425 globus pallidus, the corpus callosum and the area of the cortex above the striatum (Fig. 5d).  
426 However, H9-derived TH-positive cells remained mostly in the striatum and were also found  
427 in the globus pallidus in few animals. Quantification of graft-derived TH-positive cells (in the  
428 striatum and globus pallidus) showed that there were significantly more TH-positive cells per  
429 graft in 4X cell-transplanted rats (an average of 23,520 TH-positive cells per graft) than H9 cell-  
430 transplanted rats (1,898 TH-positive cells per graft), resulting in a larger yield (9,408 TH-  
431 positive cells per 100,000 transplanted 4X cells vs. 759 TH-positive cells per 100,000  
432 transplanted H9 cells) (Fig. 5e, f). The TH-positive 4X cell graft extended across 6-8 coronal A-  
433 P striatal sections (in a series of 8), while the H9 cell graft occupied 4-5 sections. Thus, the  
434 estimated graft volume was 61% larger in the 4X cell-transplanted rats (20.46 mm<sup>3</sup>) than in  
435 the H9 cell-transplanted rats (12.69 mm<sup>3</sup>) (Fig. 5g). The increase in TH-positive cell number  
436 resulted in a significantly higher density of TH cells in the graft in the 4X cell-transplanted  
437 group (1,090 ± 464 cells/mm<sup>3</sup> vs. 143 ± 49 cells/mm<sup>3</sup> in the H9 cell-transplanted group;  
438 P<0.0001), which is in agreement with the rapid and robust behavioral recovery observed in  
439 the 4X cell-transplanted group.

440 Further examination of the graft showed that all TH-positive neurons identified within  
441 the 4X and H9 cell grafts coexpressed the human nuclear marker human nuclear antigen (HNA)  
442 (Fig. 5h, i). In the grafts of 4X cell-transplanted rats, TH-positive neurons coexpressed FOXA2,  
443 LMX1A and EN1, indicating that they were mesDA neurons (Fig. 5j-l). To distinguish between  
444 A9 and A10 neurons, we calculated the proportion of TH-positive neurons expressing GIRK2

445 and CALB1 and found that  $75.4\% \pm 4.99$  of TH-positive neurons were GIRK2-positive (Fig. 5m-  
446 o).

447 Interestingly, we also found that TH-positive neurons derived from H9 cells were  
448 positive for FOXA2, LMX1A and EN1 (Supplementary Fig. 6c-e). This was in contrast to our *in*  
449 *vitro* experiments, in which TH-positive neurons derived from H9 cells rarely expressed FOXA2  
450 (Fig. 4b, Supplementary Fig. 5a), suggesting that the *in vivo* environment is more permissive  
451 for the development and survival of TH-positive neurons than an *in vitro* environment. Since  
452 the *in vitro* data showed that H9 cells produced a large number of VLMCs, we examined the  
453 expression of vascular markers in the grafts of both 4X cell-transplanted rats and H9 cell-  
454 transplanted rats. Within the H9 cell grafts, we identified a large population of  
455 COL3A1/COL1A1/HNA triple-positive cells, whereas in 4X cell grafts, we rarely detected  
456 COL1A1-positive cells coexpressing the marker HNA (Supplementary Fig. 6f-g). Overall, the *in*  
457 *vitro* histological data showed that 4X cells were capable of producing a robust population of  
458 mesDA neurons, consistent with the rapid motor recovery seen at 8 weeks.

459



## 460 Discussion

461 In this study, we engineered a novel type of stem cells, LR-USCs, with restricted  
462 differentiation potential. By knocking out genes involved in early lineage specification, we  
463 aimed to prevent the cells from differentiating into unwanted lineages to guide their  
464 differentiation toward the cell type of interest: mesDA neurons. Specifically, we examined the  
465 genes involved in patterning of the A-P axis because of the difficulties in fine-tuning  
466 differentiation to reproducibly generate pure caudal midbrain progenitors. We targeted  
467 transcription factors that are involved in the early specification of the hindbrain (*GBX2*) and  
468 spinal cord (*CDX1/2/4*). Importantly, the genes we targeted are not involved in the  
469 development of mesDA neurons. *CDX1/2/4* are expressed in the posterior region of the  
470 developing neural tube, which develops distinctly from the anterior neuroectoderm, and  
471 *GBX2* is initially expressed throughout the length of the hindbrain and spinal cord and is then  
472 restricted to the r1-3 regions. By knocking out these genes, we generated 4X LR-USCs, which  
473 efficiently generated midbrain cell types when differentiated under optimal or unfavorable  
474 (highly caudalizing) conditions.

475 Under caudalizing conditions, the majority of H9 cells adopted a floor plate hindbrain  
476 identity and produced a large population of nonneuronal cells expressing VLMC markers and  
477 only a small population of DA neurons. In contrast, when 4X cells were differentiated under  
478 the same conditions, a large population of ventral midbrain progenitors, which developed into  
479 DA neurons, was produced. Electrophysiological analysis of DA neurons showed that they  
480 were functional and displayed characteristic pacemaker activity. When 4X cells were  
481 transplanted *in vivo* into rats with 6-OHDA-induced MFB lesions, motor behavior improved,  
482 with amphetamine-induced rotation being fully corrected after only 8 weeks  
483 posttransplantation and the spontaneous use of the affected forelimb showing recovery after  
484 18 weeks. In comparison, transplantation of cells subjected to differentiation protocols has  
485 been reported to achieve similar normalization of amphetamine-induced rotation after five  
486 months<sup>13,14</sup>.

487 Histological examination of 4X cell grafts showed an estimated number of 23,520 TH-  
488 positive cells after 250,000 cells transplanted, which is substantially greater than that reported  
489 for other methods. This large number of TH-positive cells, along with the fact that the cells  
490 expressed *FOXA2*, *EN1* and *LMX1A*, supports the observed rapid behavioral recovery.

491 Furthermore, the majority of cells were GIRK2-positive, demonstrating that there was an  
492 abundance of DA substantia nigra neurons.

493 Thus far, we have described how knockout of four selected genes can dramatically  
494 increase the specification of PSCs to mesDA neurons by restricting the cell types along the A-  
495 P axis that they can differentiate into. It is possible to further restrict cell fate by knocking out  
496 additional genes to prevent differentiation into remaining populations of unwanted cells,  
497 which would further enhance the ability to generate mesDA neurons. Specifically, our single-  
498 cell sequencing data showed that 4X cells are capable of producing telencephalic and anterior  
499 hindbrain cell types. By targeting transcriptional determinates of these populations, we  
500 speculate that we could eliminate these populations. Furthermore, we can also target dorsal  
501 populations in addition to populations along the A-P axis. It is conceivable that by restricting  
502 the genome even further, we can produce a cell line that is capable of producing a highly pure  
503 population of mesDA neurons.

504 One of the important characteristics of the 4X cells is their ability to generate DA  
505 neurons under a broader range of growth factor conditions than other cells. This has  
506 significant advantages for clinical applications, allows for easier upscaling and reproducibility  
507 and reduces cell line variability. LR-USCs are not restricted to producing mesDA neurons;  
508 through deletion of other sets of genes, LR-USCs can be designed to generate other neural  
509 populations or cell types from other germ layers, which can be used for cell transplantation  
510 therapy or drug discovery for the treatment of a range of disorders.

511

512

## 513 **Methods**

514

### 515 **hPSC culture**

516 hESCs (H9 cell line, WiCell) were maintained on irradiated human fibroblasts in KSR medium  
517 consisting of DMEM/nutrient mixture F-12 supplemented with nonessential amino acids  
518 (NEAAs) 1%, glutamine 2 mM, 0.1 mM  $\beta$ -mercaptoethanol, 0.5% pen/strep and 20% knockout  
519 serum replacement. The KSR medium was supplemented with FGF2 (15 ng/ml; Peprotech)  
520 and Activin A (15 ng/ml; R&D Systems). Every seven days, the cells were manually passaged,  
521 and fragments were transferred to a freshly prepared gelatin-coated dish containing  
522 irradiated fibroblasts <sup>41</sup>.

523

### 524 **Differentiation into CNPs**

525 hESCs were differentiated into CNPs as described previously <sup>29</sup>. Briefly, hESC fragments were  
526 cut from colonies growing on irradiated feeders (CCD-1079Sk, ATCC) and plated in vitronectin-  
527 coated plates in N2B27 medium containing neurobasal medium (NBM) and DMEM/F-12  
528 supplemented with 1% N2 supplement at a 1:1 ratio, 1% B27 supplement minus vitamin A, 1%  
529 insulin/transferrin/selenium-A (ITS- A), 0.3% glucose, 1% Glutamax supplement, and 0.5%  
530 penicillin/streptomycin (all from Life Technologies). The medium was supplemented with  
531 SB431542 (SB; 10  $\mu$ M, Tocris Bioscience) and CHIR99021 (CHIR; 3  $\mu$ M, Stemgent) for 4 days.  
532 For the 11 DIV CNP differentiation protocol, cells were cultured as described above and  
533 supplemented with 400 nM SAG (Millipore). After day 4 the colonies were dissected into 0.5  
534 mm pieces and cultured in suspension in low-attachment 96-well plates (Corning) in N2B27  
535 medium supplemented with FGF2 (20 ng/ml; PeproTech) and 400 nM SAG.

536

### 537 **Differentiation into mesDA neurons**

538 mesDA neurons were generated by implementing previously described protocols with minor  
539 modifications <sup>14</sup>. Briefly, from day 0 to day 9, cells were grown in N2B27 medium  
540 supplemented with 10  $\mu$ M SB, CHIR (0.5 to 1  $\mu$ M), 0.1  $\mu$ M LDN193189 (LDN; Stemgent), and  
541 400 nM SAG (Millipore). On day 4, the colonies were cut into fragments and cultured in  
542 suspension. From day 9 to day 11, the supplements in the medium were replaced with FGF8  
543 (100 ng/ml; R&D Systems). From day 11, the medium was supplemented with FGF8 (100  
544 ng/ml), LM22A4 (2  $\mu$ M), and ascorbic acid (200  $\mu$ M; Sigma). On day 16, the cells were

545 dissociated with Accutase and subsequently grown on culture plates coated with  
546 polyornithine, fibronectin, and laminin (all from Sigma). Neural differentiation medium  
547 consisting of 1% B27 supplement, 25 U/mL pen/strep, 0.5% Glutamax was supplemented with  
548 200  $\mu$ M ascorbic acid, LM22A4 (2  $\mu$ M), 1  $\mu$ M DAPT (Tocris Bioscience), GDNF (10 ng/ml), and  
549 dcAMP (500  $\mu$ M). The medium was changed every second day until the end of the experiment.  
550 Alternatively, on day 16, the cultured cells were maintained in suspension to generate  
551 organoids.

552

553

#### 554 **Generation of CRISPR lentiviral vectors**

555 A pLV-4gRNA-GBX2-RFP lentiviral plasmid containing four CRISPR target sites in GBX2 was  
556 generated using the multiplex CRISPR lentiviral vector system<sup>42</sup>. First, oligos containing the  
557 20 bp protospacer sequence against the four CRISPR target regions in *GBX2* (Supplementary  
558 Table 1) were cloned by BbsI digestion and ligated into the following entry plasmids, i.e.,  
559 ph7SK-gRNA, phU6-gRNA, pmU6-gRNA and pH1-gRNA (Addgene #53189, 53188, 53187 and  
560 53186), to generate four gRNA GBX2 entry plasmids. Second, using the golden recombination  
561 method, the pLV-GG-hUbc-dsRED plasmid (Addgene # 84034) and the gRNA GBX2 entry  
562 plasmids were recombined by BsmBI digestion and ligation to form the final pLV-4gRNA-GBX2-  
563 RFP plasmid. A multiplex CRISPR plasmid containing CRISPR targets in the *GBX2* and *CDX1/2/4*  
564 genes was generated in a similar manner as above. Four entry plasmids, i.e., ph7SK-GBX2-  
565 gRNA, phU6-CDX4-gRNA, pmU6-CDX1-gRNA and pH1-CDX2-gRNA, were generated and  
566 recombined with pLV-hUbc-Cas9-T2A-GFP (Addgene #53190), resulting in the generation of  
567 the pLV-hUbc-GBX2-CDX124-Cas9-T2A-GFP plasmid (see Supplementary Table 1 for gRNA  
568 sequences).

569

#### 570 **Generation of knockout cell lines**

571 Three lentiviral plasmids, pLV-4gRNA-GBX2-RFP, pLV-hUbc-GBX2-CDX124-Cas9-T2A-GFP and  
572 lentiCas9-Blast (Addgene # 52962), were used to produce lentiviruses. Lentiviral production  
573 was performed as described previously<sup>43</sup>. To generate the GBX2 knockout cell line, H9 cells  
574 were transduced with LV-4gRNA-GBX2-RFP and lentiCas9-Blast, and after three days,  
575 transduced cells were selected using 10  $\mu$ g/ml blasticidin for 6 days (Supplementary Fig. 1).  
576 FACS was then used to separate single RFP-positive cells in a 96-well plate using the 561 nm

577 laser on a FACSAriaIII (BD Biosciences, San Jose, CA). Indels at the corresponding target sites  
578 in the clones were analyzed by genomic PCR. To generate the 4X knockout cell line, H9 cells  
579 were infected with LV-hUbC-GBX2-CDX124-Cas9-T2A-GFP, and after 7 days, single GFP-  
580 positive cells were sorted by FACS (Supplementary Fig. 2). Allele-specific mutations in both  
581 the *GBX2*<sup>-/-</sup> and 4X cell lines were confirmed using whole-exome sequencing. Whole-exome  
582 sequencing and mapping were performed by BGI (BGI, Copenhagen). Integrated Genome  
583 Browser V 2.10.0 was used to identify allele-specific mutations. To identify large deletions that  
584 could not be mapped by the alignment tools, individual sequencing reads were extracted from  
585 the FastQ files using Grep and manually analyzed.

586

### 587 **QPCR and NanoString**

588 For QPCR and NanoString experiments, RNA was extracted using the Qiagen RNeasy mini kit  
589 and treated with DNase I according to a standard protocol. cDNA was generated from 500 ng  
590 of total RNA using Superscript III and random primers following the manufacturer's  
591 instructions. For QPCR, TaqMan Universal Master mix II without UNG and TaqMan probes  
592 were used (Supplementary Table 2). NanoString experiments were performed using the  
593 NanoString nCounter SPRINT (NanoString Technologies) according to the manufacturer's  
594 instructions. Briefly, 200 ng of total RNA was used. Reporter probes were hybridized for 20  
595 hours at 65 °C. A custom designed NanoString CodeSet consisting of a panel of capture and  
596 reporter probes designed to target 100 nucleotides of the gene of interest and a panel of  
597 housekeeping genes was used (Supplementary Table 3). RNA expression data were  
598 normalized to the expression of housekeeping genes.

599

### 600 **Immunofluorescence**

601 Cells cultured on glass coverslips or suspended in culture plates as spheroids were collected.  
602 The samples were washed with PBS two times, fixed in 4% paraformaldehyde (PFA) in PBS at  
603 4 °C for 15 min (glass coverslips) or 2 hours (spheroids), and washed 3 times with PBS for 10  
604 min each. The spheroids were transferred to 20% sucrose in PBS, incubated at 4 °C overnight  
605 and embedded in OCT (Tissue-Tek). Sections were cut at a thickness of 10 µm using a cryostat  
606 (Crostar NX70) at -20 °C. The coverslips and sections were incubated in 0.25% Triton X in PBS  
607 (PBST) for 10 min and blocked in 5% donkey serum (Almeco) in PBST for 1 hour at room  
608 temperature. The following primary antibodies were applied overnight at 4 °C: goat anti-OTX2

609 (1:500, R&D Systems, cat# AF1979), mouse anti-CDX2 (1:200, BioGenex, cat# MU392-UC),  
610 mouse anti-Engrailed1 (EN1, 1:40, DSHB, cat# 4G11-s), rabbit anti-EN1 (1:50, Merck, cat#  
611 HPA073141), rabbit anti-FOXA2 (1:500, Cell Signaling, cat# 8186), goat anti-FOXA2 (1:200,  
612 R&D Systems, cat# AF2400), rabbit anti-LMX1A (1:5000, Millipore, cat# AB10533), mouse anti-  
613 TH (1:2000, Millipore, cat# MAB318), rabbit anti-TH (1:1000, Pel Freez, cat# P40101-150),  
614 rabbit anti-GIRK2 (1:500, Alomone, cat# APC-006), mouse anti-CALB1 (1:5000, SWANT, cat  
615 #300), rabbit anti-Collagen3A1 (1:1000, NovusBio, cat# NB120-6580), sheep anti-hCOL1A1  
616 (1:200, R&D Systems, cat# AF6220), and mouse anti-HNA (1:200, Abcam, cat# ab191181).  
617 After the cells were washed with PBST three times for 10 min each, corresponding secondary  
618 antibodies (1:200, Jackson ImmunoResearch Laboratories or 1:1000, Invitrogen) were applied  
619 for one hour at room temperature. After the secondary antibodies were removed, the cells  
620 were washed three times with PBST for 10 min each in the dark. The nuclei were  
621 counterstained with DAPI (1 µg/ml, Sigma) and rinsed with PBS three times for 5 min each.  
622 The slides or coverslips were mounted with PVA-DABCO. Images were captured with a  
623 confocal microscope (Zeiss LSM 780) and Zen software.

624

#### 625 **Flow cytometry analysis**

626 The cells were washed two times with PBS- and dissociated with Accutase to obtain single  
627 cells. The cells were centrifuged at 300×g for 4 min and resuspended in 4% PFA for 10 min at  
628 room temperature. Then, the cells were washed with PBS-, centrifuged, resuspended in PBST,  
629 centrifuged again, and blocked in 5% donkey serum for 30 min at room temperature. Primary  
630 antibodies in blocking solution were added to the cells, and the cells were incubated for 2  
631 hours at room temperature. The cells were washed once with PBST, resuspended in secondary  
632 antibodies in blocking solution and incubated for 30 min at room temperature in the dark. The  
633 cells were washed with PBST overnight at 4 °C and resuspended in PBS for flow cytometry  
634 using a NovoCyte Quanteon analyzer (Acea Biosciences Inc., Santa Clara, CA). The data were  
635 analyzed with FlowJo software (v. 10, Ashland, OR).

636

#### 637 **Quantification of immunofluorescence images**

638 The percentages of OTX2/DAPI double-positive, GIRK2/TH double-positive and CALB1/TH  
639 double-positive cells, either in culture or within a graft, were quantified with ImageJ software  
640 (1.53) by semiautomatic object-based colocalization analysis <sup>44</sup>. The Colocalization Image

641 Creator Plugin was used to process the multichannel immunofluorescence images into  
642 multichannel binary and grayscale output images. Binary output images were generated by  
643 processing input channels for ImageJ filters that applied an automatic local intensity  
644 threshold, radius outlier removal, watershed segmentation, eroding, hole filling, Gaussian  
645 blurring and maximum algorithms. Binary objects of an inappropriately small size were further  
646 removed from the output images via a defined minimum area size. To improve the  
647 visualization of the colocalization signals, the object overlap was restricted to the nuclei of the  
648 cells. The accuracy of the binary object segmentation was visually verified via grayscale output  
649 images. Once verified, the binary objects, representing either individually labeled or colabeled  
650 cells, were quantified automatically using the Colocalization Object Counter plugin. All  
651 immunofluorescence images were analyzed with conserved binary object segmentation  
652 settings. A minimum of 4 random fields captured at 20x and 63x were used for the  
653 quantification of OTX2 positive cells in culture. Quantification of GIRK2/TH double-positive  
654 and CALB1/TH double-positive cells within the graft was performed blindly by analyzing 4  
655 nonoverlapping images taken at 20x from 2 sections per graft per animal.

656

### 657 **RNA sequencing and data analysis**

658 Library construction, sequencing and initial data filtering, including adaptor removal, were  
659 performed by the BGI Europe Genome Center. Total RNA was subjected to oligo dT-based  
660 mRNA enrichment. Sequencing of 100 bp paired-end reads was performed on the DNBseq  
661 platform. More than 20 million clean reads were obtained per sample. The reads were aligned  
662 to the Human genome build hg38 (Ensemble release 92) using HISAT2 aligner (v2.1.0) <sup>45</sup>.  
663 Transcript quantification was performed using FeatureCount (v1.6.4), and the read counts  
664 were normalized for effective gene length and sequencing depth to yield transcripts per  
665 kilobase million (TPM) <sup>46</sup>. Differentially expressed genes were identified from count tables  
666 using edgeR (v3.32) <sup>47</sup>. Centering and univ variance scaling were applied to TPM values to  
667 construct heatmaps and perform principal component analysis (PCA) by Clustvis using SVD  
668 with imputation <sup>48</sup>.

669

### 670 **Single-cell RNA-seq and data analysis**

671 On days 16 and 62, cultured cells were dissociated into single cells using Accutase. On day 16,  
672 neurospheres (n = 10 biological replicates per cell line) were pooled together, and on day 62,



673 four biological replicates per cell line were pooled together. To construct the library, the 10X  
674 Genomics Chromium Next GEM Single Cell 3' kit v 3.1 was used according to a standard  
675 protocol. Each of the four groups (day 16 H9 cells, day 16 4X cells, day 62 H9 cells and day 62  
676 4X cells) was run in separate lanes of the Chromium controller, and a total of 8,000 cells were  
677 loaded per lane. Next-generation sequencing was performed by the NGS Core Center,  
678 Department of Molecular Medicine, Aarhus University Hospital, Denmark. Sequencing was  
679 performed on an Illumina NovaSeq instrument. The Cell Ranger Single-Cell Software Suite (v  
680 3.1.0) was used for sample demultiplexing, barcode processing and single-cell 3' gene  
681 counting. The reads were aligned to the human GRCh38 reference genome. Further analysis,  
682 including quality filtering, dimensionality reduction, and application of standard unsupervised  
683 clustering algorithms, was performed using the Seurat R package (v 3.2.1). To exclude outlier  
684 cells, the number of genes expressed in each cell was plotted for each sample to select the  
685 optimal allowed minimum number of genes per cell. The minimum numbers of genes per cell  
686 were set to 3000 for day 16\_H9 cells, 2000 for day 16\_4X cells, 3000 for day 62\_H9 cells, and  
687 3000 for day 62\_4X cells. Cells with a high percentage of reads mapped to mitochondrial genes  
688 were also removed. For day 16 samples, all cells with more than 10% mitochondrial RNA were  
689 removed; for day 62, the limit was 15%. The R package DoubletFinder (v.2.0.3) was used to  
690 remove cell doublets from the single-cell transcriptome data, with the expected percentage  
691 of doublet cells being set at 7.5%. The single-cell data were normalized by dividing the gene  
692 counts of each cell by the total counts for that cell, multiplying by a scaling factor of 10,000,  
693 and natural-log transforming the result. Dimensionality reduction was performed using the  
694 UMAP technique. Clustering was performed by Seurat's graph-based clustering approach  
695 using the FindClusters function, with the resolution set to 0.6. Various single-cell plots were  
696 generated using Seurat in R.

697

## 698 **Electrophysiology**

699 Electrophysiological recordings of 4X cells were performed at 80-84 DIV. 4X cells cocultured  
700 with astrocytes on 13 mm  $\emptyset$  coverslips were transferred to the recording chamber following  
701 progressive transition from culture medium to artificial cerebrospinal fluid (aCSF) by adding  
702 five drops (200  $\mu$ L each) of aCSF to the cultured medium over 20 s. After being transferred  
703 into the recording chamber, the coverslips were continuously perfused at room temperature



704 with aCSF containing (in mM) 119 NaCl, 2.5 KCl, 26 NaHCO<sub>3</sub>, 1 NaH<sub>2</sub>PO<sub>4</sub>, 11 D-glucose, 2 CaCl<sub>2</sub>,  
705 and 2 MgCl<sub>2</sub> (adjusted to pH 7.4).

706 The recording chamber was mounted on an upright microscope (Scientifica) linked to a digital  
707 camera (QImaging Exi Aqua). The 4X cells were visualized using a 63X water-immersion  
708 objective (Olympus, LumiPlan). The cells selected for electrophysiological recordings exhibited  
709 a neuron-like morphology with fine branching neurites. Clusters of amassed cells were  
710 avoided. Acquisitions were performed in whole-cell configuration in current-clamp mode  
711 using Clampex 10.6 software connected to a Multiclamp 700B amplifier via a Digidata 1550A  
712 digitizer (Molecular Devices). The data were low-pass filtered at 200 Hz and digitized at 10  
713 kHz, and the whole-cell capacitance was compensated. Patch pipettes (resistance of 5-10  
714 MOhm) were filled with an internal solution containing (in mM) 153 K-gluconate, 10 HEPES,  
715 4.5 NaCl, 9 KCl, 0.6 EGTA, 2 MgATP, and 0.3 NaGTP. The pH and osmolarity of the internal  
716 solution were close to physiological conditions (pH 7.4, osmolarity of 297 mOsm). The access  
717 resistance of the cells in our sample was ~ 30 MOhm. Among the recordings of 30 neurons  
718 that were obtained, 16 were kept for analysis. The rest of the recordings were from neurons  
719 that either were nonrespondent to depolarizing steps (putative astrocytes), were unstable, or  
720 did not exhibit spontaneous activity; therefore, these recordings were discarded from the  
721 analysis.

722 Spontaneous excitatory postsynaptic potentials (sEPSPs) were recorded in current-clamp gap-  
723 free mode (clamped at -45 mV). Current-clamp recordings (at -60 mV) of evoked action  
724 potentials were performed by applying a repetitive current pulse (800 ms) with an incremental  
725 amplitude (20 pA).

726 Data analysis was performed using Clampfit 10.6 software (Molecular Devices). To visualize  
727 the distribution of the firing frequency, the number of spontaneous spikes per second in  
728 current-clamp mode was counted over a one-minute period using the threshold tool of  
729 Clampfit software and classified in bins with a width equal to 1 (corresponding to 1 Hz). The  
730 data were visualized using the frequency distribution mode of GraphPad Prism V9 software.

731

### 732 **HPLC analysis of dopamine content**

733 At 80 DIV, 1-2 organoids per sample were collected and homogenized in 100 µl of 0.2 M HClO<sub>4</sub>.  
734 Then, the samples were centrifuged, and the supernatant was collected and spun through a  
735 0.2 µm spin filter (Costar Spin-X, Merck) at 14000 × g at 4 °C for 1 min and loaded into an HPLC

736 system (Thermo Scientific Ultimate 3000). The mobile phase was 12.5% acetonitrile buffer (pH  
737 3.0, 86 mM sodium dihydrogen phosphate, 0.01% triethylamine, 2.08 mM 1-octanesulfonic  
738 acid sodium salt, and 0.02 mM EDTA). The flow rate of the mobile phase was adjusted to 1.5  
739 ml/min. The dopamine level was calculated using a standard curve generated using external  
740 DA standards (the standard curve coefficient of determination was 0.99946). Dopamine  
741 content was then normalized to the protein concentration and is expressed in nmol/g.

742

#### 743 **Preparation of cells for *in vivo* transplantation**

744 For each batch of single cells, ten neurospheres at 16 DIV from each cell line (H9 and 4X) were  
745 collected and washed twice with PBS. Then, 500  $\mu$ l of Accutase (supplemented with 100  $\mu$ g/ml  
746 DNase) was added, and the cells were incubated for 10 min at 37 °C. The neurospheres were  
747 first pipetted with a 1 ml pipette followed by a 200  $\mu$ l pipette to yield a single-cell solution.  
748 Five hundred microliters of washing medium (DMEM/F12 supplemented with 1% human  
749 serum albumin) was added, and the cells were spun down at 400 $\times$ g for 5 min at room  
750 temperature. The cell pellets were resuspended at a concentration of 100,000 cells/ $\mu$ l in HBSS  
751 (supplemented with 100  $\mu$ g/ml DNase) and kept on ice. The cell suspension was kept on ice  
752 for a maximum of three hours, after which a new batch of cells was prepared.

753

#### 754 ***In vivo* transplantation**

755 Adult (9 weeks old) male (225-300 g) (n= 30) NIH (NTac:NIH-*Foxn1<sup>tmu</sup>*) nude rats purchased  
756 from Taconic Biosciences A/S were grouped-housed in ventilated cages in a clean room under  
757 a 12-hr light/dark cycle with *ad libitum* access to sterile food and water. In addition to a  
758 standard rat diet, they were given peanuts to increase caloric intake. All animal experiments  
759 were conducted in accordance with the guidelines of the European Union Directive  
760 (2010/63/EU) and approved by the Danish Animal Inspectorate.

761 The rats were anesthetized with isoflurane (5% for induction, 2-3% for maintenance), 1.2  
762 L/min of O<sub>2</sub>, and 0.6 L/min of atmospheric air, and placed in a stereotaxic frame (Stoelting)  
763 and unilaterally injected with 6-OHDA (Sigma-Aldrich A/S) (2  $\mu$ l of 7  $\mu$ g/ $\mu$ l free base in saline  
764 containing 0.02% ascorbic acid)<sup>49</sup> into the right MFB (anteroposterior (AP), -4.4; mediolateral  
765 (ML) -1.1; dorsoventral (DV), -7.6; tooth bar, 3.3) using a Hamilton syringe with a glass cannula  
766 attached. Following injection, the cannula was left in place for 5 min before being slowly  
767 retracted. The incision was sutured, and the animals were injected with buprenorphine (0.36

768 mg/kg) as an analgesic. Once the animals were fully awake, they were placed back into their  
769 cages with wet food and 0.009 mg/ml Temgesic in water.

770 Lesioning efficiency was assessed 3 weeks postsurgery using the amphetamine-induced  
771 rotation test, and animals that exhibited >5 rotations/min were used for further experiments.  
772 The selected rats were divided into 3 groups with a similar average number of amphetamine-  
773 induced rotations: the 6-OHDA lesion (no transplantation) group (n = 8), the H9 cell-  
774 transplanted group (n = 9) and the 4X cell-transplanted group (n = 9) (see Supplementary Fig.  
775 6a, b). Four weeks after lesioning, the animals in the H9 cell-transplanted and 4X cell-  
776 transplanted groups were stereotaxically injected into the striatum (AP, +0.5; ML, -3; DV, -  
777 4.6/4.8) with 250,000 cells of the respective cell type in a volume of 2.5  $\mu$ l using a protocol  
778 similar to the one described above. All three groups were sacrificed 22 weeks postlesioning  
779 (i.e., 18 weeks after transplantation). Two transplanted rats did not complete the study and  
780 were euthanized due to health issues: one in the 4X cell-transplanted group (week 8  
781 posttransplantation) due to a broken tail and one in H9 cell-transplanted group due to  
782 hindlimb paralysis (week 17 posttransplantation).

783

#### 784 **Amphetamine-induced rotation test**

785 An amphetamine-induced rotation test was performed as described previously<sup>50</sup> one week  
786 prior to transplantation to assess the effects of the lesions and 8 and 18 weeks  
787 posttransplantation. The animals were intraperitoneally (i.p.) injected with 5 mg/kg D-  
788 amphetamine and connected to a rotameter (LE 902, PanLab, Harvard Apparatus) coupled to  
789 a LE 3806 Multicounter (PanLab, Harvard Apparatus). The number of body rotations over a  
790 period of 90 min was recorded. The data are expressed as the net number of full body turns  
791 per minute, with ipsilateral rotations having a positive value and contralateral rotations having  
792 a negative value. Animals exhibiting > 5 turns/min were considered successfully lesioned. One  
793 rat had a technical issue during one of the rotation tests and was excluded from this behavioral  
794 test.

795

#### 796 **Cylinder test**

797 The cylinder test was used to assess paw use asymmetry three weeks postlesioning (one week  
798 prior to transplantation) and 18 weeks posttransplantation. The animals were placed in a  
799 transparent Plexiglas cylinder (height of 30 cm, diameter of 20 cm), and two mirrors were

800 placed behind the cylinder so that the cylinder surface could be fully visualized. Spontaneous  
801 activity was video recorded for a total of 5 min. Data analysis was performed by a researcher  
802 blinded to the groups using VCL Media Player software in slow motion as previously described  
803 <sup>51</sup>. Because most of the exploratory motor activity of the animals was limited to the first 2 min  
804 and there was little movement after this timepoint, activity in the first 2 min were analyzed,  
805 and activity after this time point was analyzed only if the animal exhibited fewer than 10  
806 movements (wall touches and rears). The following behaviors were scored to determine the  
807 extent of forelimb-use asymmetry <sup>51</sup>: a) independent use of the left or right forelimb when  
808 touching the wall during a full rear or landing on the floor after a rear and b) simultaneous use  
809 of both the left and right forelimb to contact the wall of the cylinder during a full rear, for  
810 lateral movements along the wall (wall stepping) and for landing on the floor following a rear.  
811 The data are presented as the percentage of time each forelimb (left or right) or both  
812 forelimbs were used relative to all movements (wall and floor).

813

#### 814 **Immunohistochemical analysis of brain slices**

815 The rats were killed 23 weeks after 6-OHDA-induced lesioning by an overdose of pentobarbital  
816 (50 mg/kg i.p.). During respiratory arrest, they were perfused through the ascending aorta  
817 with ice-cold saline followed by 4% cold PFA (in 0.1 M NaPB, pH 7.4). The brains were  
818 extracted, postfixed in PFA for 2 hours and transferred to 25% sucrose solution (in 0.02 M  
819 NaPB) overnight. The brains were sectioned into 35  $\mu$ m thick coronal sections on a freezing  
820 microtome (Microm HM 450, Brock and Michelsen), separated into serial coronal sections  
821 (series of 8 for the striatum and the substantia nigra), and stored at -20 °C.

822 Immunohistochemical staining was performed on free-floating brain sections using the  
823 following primary antibodies: mouse anti-rat TH (1:4000, MAB318, Merck Millipore), rabbit  
824 anti-Girk2 (1:500, APC-006, Alomone), rabbit anti-TH (1:1000, PeIFreeze), mouse IgG1 anti-  
825 CALB1 (1:5000, 28k, SWANT), mouse IgG1 anti-HNA (1:200, 151181, Abcam), goat anti-FOXA2  
826 (1:200, AF2400), sheep anti-hCOL1A1 (1:200, R&D Systems), rabbit anti-hCOL3A1 (1:1000),  
827 rabbit anti-EN1 (1:50), and rabbit anti-LMX1A (1:5000).

828 Immunohistochemistry was performed as previously described <sup>49</sup> with avidin-biotin-  
829 peroxidase complex (ABS Elite, Vector Laboratories) and 3,3-diaminobenzidine (DAB) as a  
830 chromogen to visualize the signal. The sections were mounted on chrome-alum gelatin-coated

831 slides, dehydrated, and coverslipped. The slides were analyzed using a Olympus VS120 Slide  
832 Scanner (upright widefield fluorescence) with a 20x objective.

833 For immunofluorescence, free-floating sections were blocked in 5% normal donkey serum in  
834 0.25% Triton X-100 in KBPS and then incubated overnight with the selected primary antibody  
835 in 2.5% donkey serum and 0.25% Triton X-100 in KPBS at room temperature. The sections  
836 were washed with KPBS, preblocked for 10 min in 1% donkey serum and 0.25% Triton X-100  
837 in KPBS and incubated for 2 hours with the following species-specific fluorochrome-  
838 conjugated secondary antibodies made in donkey: Alexa Fluor 488-conjugated anti-mouse IgG  
839 (1:200, Jackson ImmunoResearch), Alexa Fluor 568-conjugated anti-goat IgG (1:1000, A11057,  
840 Invitrogen), Alexa Fluor 647-conjugated anti-rabbit IgG (1:200, Jackson ImmunoResearch),  
841 Alexa Fluor 568-conjugated anti-rabbit IgG (1:1000, A10042, Invitrogen), Alexa Fluor 647-  
842 conjugated anti-mouse IgG (1:1000, A-31571, Invitrogen) and Alexa Fluor 568-conjugated  
843 anti-mouse IgG1 (1:1000, A10037, Invitrogen), Alexa Fluor 568-conjugated anti-sheep IgG  
844 (1:1000, Invitrogen). DAPI (1:2000, Sigma-Aldrich A/S) was used for nuclear staining. The  
845 sections were mounted on chrome-alum gelatin-coated slides with Dako fluorescent  
846 mounting medium.

847

#### 848 **Microscopic analysis (TH-positive cell number and yield and graft volume)**

849 Coronal sections (1:8) from each animal were immunostained for TH, and DA neurons in the  
850 graft were analyzed. An Olympus VS120 Slide Scanner (upright widefield fluorescence)  
851 (Bioimaging Core Facility, Aarhus University) was used to acquire images of the slides using a  
852 20x objective. All sections with visible grafts were selected: 3-5 sections per H9 cell-  
853 transplanted animal and 4-8 sections per 4X cell-transplanted animal. The area in which the  
854 number of TH-positive cells was quantified included the striatum and globus pallidus, but TH-  
855 positive cells in the cortex and corpus callosum were not included. The images were analyzed  
856 by identifying cells in the region of interest (ROI) using QuPath software<sup>52</sup>. The settings  
857 adapted for each section depending on the staining, and the following settings were used:  
858 detection image = optical density sum, requested pixel size = 0.5  $\mu\text{m}$ , background radius = 15-  
859 30  $\mu\text{m}$ , threshold = 0.15-0.3, median filter radius = 0-3  $\mu\text{m}$ , sigma = 0.7-2  $\mu\text{m}$ , minimum area  
860 = 85-130  $\mu\text{m}^2$ , maximum area = 500-1200  $\mu\text{m}^2$ , max background intensity = 2, cell expansion  
861 = 2  $\mu\text{m}$ . The cells were classified by shape, including that of the cell nucleus, and that the  
862 boundaries were smoothed.

863 To estimate the number of cells in a full graft, the total number of TH-positive cells per animal  
864 was determined with QuPath software and multiplied by 8, and the Abercrombie method<sup>53</sup>  
865 was used to correct for double counting of cells spanning more than one section. The  
866 Abercrombie factor of each group was calculated as the average thickness per section divided  
867 by (the averaged thickness + the average TH-positive cell size). These numbers were calculated  
868 by sampling 3 sections and 18 cells per animal from 3 different animals per group. The total  
869 number of cells in a graft was calculated as the Abercrombie factor x the total number of TH-  
870 positive cells x 8. The number of surviving cells (yield) was estimated per 100,000 transplanted  
871 cells. The volume of each graft was estimated as  $V = A_1T_1 + A_2T_1 + \dots + A_nT_1$ , where V is  
872 estimated volume, T1 is the sampling interval of a 1/8 series (8x35  $\mu\text{m}$ ), and A(n) is the area  
873 TH-positive area in the section (n)<sup>15</sup>.

874

#### 875 **Statistical analysis**

876 All statistical analyses were performed using GraphPad Prism v 9.1.1.225. One-way ANOVA or  
877 two-way ANOVA was performed, and Sidak's test was used for post hoc analysis when  
878 appropriate. Unpaired, two-tailed t-tests were used when comparing only the grafted groups.  
879 All data are presented as the mean  $\pm$  standard error of the mean (SEM) or  $\pm$  standard deviation  
880 (SD) (as indicated).  $P < 0.05$  was considered significant.

881

#### 882 **Acknowledgments**

883 We thank Susanne Hvolbøl Buchholdt Seldrup for assistance with culturing and maintaining  
884 the pluripotent stem cell lines. We thank Gitte Ulbjerg Toft for excellent technical help with  
885 the *in vivo* rat experiments and postmortem histological analysis of the brains. We would also  
886 like to thank Per Fuglsang Mikkelsen for assistance with HPLC. We are grateful for the  
887 assistance and use of the AU Health Bioimaging Facility, Animal Facility and FACS Core Facility.  
888 Funding: This study was supported by Lundbeckfonden grant no. DANDRITE-R248-2016-2518  
889 and the Parkinsonforeningen. MD is a partner of BrainStem—Stem Cell Center of Excellence  
890 in Neurology, funded by Innovation Fund Denmark.

891

#### 892 **Author contributions**

893 Conceptualization: M.D.; methodology: M.M., M.C., N.M.J., M.M.R., M.D.; formal analysis:  
894 M.M., M.C., F.F., N.M.J., J.L., E.U., I.H.K., P.Q., M.M.R., M.D.; investigation: M.M., M.C., F.F.,

895 N.M.J., J.L., E.U., I.H.K., P.Q., M.R.R., M.D.; resources: S.N., M.R.R., M.D.; writing - original  
896 draft: M.R.R., M.D.; writing - review & editing: M.C., F.F., N.M.J., J.L., E.U., P.Q., M.M.R.,  
897 M.D.; visualization: M.M., M.C, N.M.J., J.L., E.U., M.R.R., M.D.; supervision: M.M.R., M.D.;  
898 funding acquisition: M.M.R., M.D. All authors read and approved the final manuscript.

899

900 **Competing interests**

901 The authors declare no competing interests

902



903 **References**

- 904 1. Hynes, M. *et al.* Induction of midbrain dopaminergic neurons by sonic hedgehog.  
905 *Neuron* **15**, 35–44 (1995).
- 906 2. Castelo-Branco, G. *et al.* Differential regulation of midbrain dopaminergic neuron  
907 development by Wnt-1, Wnt-3a, and Wnt-5a. *Proc. Natl. Acad. Sci. U. S. A.* **100**,  
908 12747–12752 (2003).
- 909 3. Echelard, Y. *et al.* Sonic hedgehog, a member of a family of putative signaling  
910 molecules, is implicated in the regulation of CNS polarity. *Cell* **75**, 1417–1430 (1993).
- 911 4. Nordström, U., Jessell, T. M. & Edlund, T. Progressive induction of caudal neural  
912 character by graded Wnt signaling. *Nat. Neurosci.* **5**, 525–532 (2002).
- 913 5. Hidalgo-Sánchez, M., Millet, S., Simeone, A. & Rosa-Magda Alvarado-Mallart.  
914 Comparative analysis of Otx2, Gbx2, Pax2, Fgf8 and Wnt1 gene expressions during the  
915 formation of the chick midbrain/hindbrain domain. *Mech. Dev.* **81**, 175–178 (1999).
- 916 6. Joyner, A. L., Liu, A. & Millet, S. Otx2, Gbx2 and Fgf8 interact to position and maintain  
917 a mid–hindbrain organizer. *Curr. Opin. Cell Biol.* **12**, 736–741 (2000).
- 918 7. Arenas, E., Denham, M. & Villaescusa, J. C. How to make a midbrain dopaminergic  
919 neuron. *Development* **142**, 1918–1936 (2015).
- 920 8. Fasano, C. A., Chambers, S. M., Lee, G., Tomishima, M. J. & Studer, L. Efficient  
921 Derivation of Functional Floor Plate Tissue from Human Embryonic Stem Cells. *Cell*  
922 *Stem Cell* **6**, 336–347 (2010).
- 923 9. Denham, M. *et al.* Glycogen synthase kinase 3 $\beta$  and activin/nodal inhibition in human  
924 embryonic stem cells induces a pre-neuroepithelial state that is required for  
925 specification to a floor plate cell lineage. *Stem Cells* **30**, 2400–2411 (2012).
- 926 10. Kriks, S. *et al.* Dopamine neurons derived from human ES cells efficiently engraft in  
927 animal models of Parkinson’s disease. *Nature* **480**, 547–51 (2011).
- 928 11. Kirkeby, A. *et al.* Generation of Regionally Specified Neural Progenitors and Functional  
929 Neurons from Human Embryonic Stem Cells under Defined Conditions. *Cell Rep.* **1**,  
930 703–714 (2012).
- 931 12. Kirkeby, A. *et al.* Predictive Markers Guide Differentiation to Improve Graft Outcome  
932 in Clinical Translation of hESC-Based Therapy for Parkinson’s Disease. *Cell Stem Cell*  
933 **20**, 135–148 (2017).
- 934 13. Kim, T. W. *et al.* Biphasic Activation of WNT Signaling Facilitates the Derivation of



- 935 Midbrain Dopamine Neurons from hESCs for Translational Use. *Cell Stem Cell* **28**, 343-  
936 355.e5 (2021).
- 937 14. Nolbrant, S., Heuer, A., Parmar, M. & Kirkeby, A. Generation of high-purity human  
938 ventral midbrain dopaminergic progenitors for in vitro maturation and intracerebral  
939 transplantation. *Nat. Protoc.* **12**, 1962–1979 (2017).
- 940 15. Piao, J. *et al.* Preclinical Efficacy and Safety of a Human Embryonic Stem Cell-Derived  
941 Midbrain Dopamine Progenitor Product, MSK-DA01. *Cell Stem Cell* **28**, 217-229.e7  
942 (2021).
- 943 16. Exelby, K. *et al.* Precision of tissue patterning is controlled by dynamical properties of  
944 gene regulatory networks. *Development* **148**, 1–14 (2021).
- 945 17. Kiecker, C. *et al.* Gbx2 functions as a transcriptional repressor to regulate the  
946 specification and morphogenesis of the mid-hindbrain junction in a dosage- and  
947 stage-dependent manner. *Development* **123**, 532–52 (1998).
- 948 18. Inoue, F., Kurokawa, D., Takahashi, M. & Aizawa, S. Gbx2 Directly Restricts Otx2  
949 Expression to Forebrain and Midbrain, Competing with Class III POU Factors. *Mol. Cell.*  
950 *Biol.* **32**, 2618–2627 (2012).
- 951 19. Millet, S. *et al.* A role for Gbx2 in repression of Otx2 and positioning the mid/hindbrain  
952 organizer. *Nature* **401**, 161–164 (1999).
- 953 20. Andersson, E. *et al.* Identification of intrinsic determinants of midbrain dopamine  
954 neurons. *Cell* **124**, 393–405 (2006).
- 955 21. Friling, S. *et al.* Efficient production of mesencephalic dopamine neurons by Lmx1a  
956 expression in embryonic stem cells. *Proc. Natl. Acad. Sci. U. S. A.* **106**, 7613–8 (2009).
- 957 22. Denham, M. *et al.* Gli1 is an inducing factor in generating floor plate progenitor cells  
958 from human embryonic stem cells. *Stem Cells* **28**, 1805–1815 (2010).
- 959 23. Acampora, D. *et al.* Forebrain and midbrain regions are deleted in Otx2(-/-) mutants  
960 due to a defective anterior neuroectoderm specification during gastrulation.  
961 *Development* **121**, 3279–3290 (1995).
- 962 24. Ang, S. L. *et al.* A targeted mouse Otx2 mutation leads to severe defects in  
963 gastrulation and formation of axial mesoderm and to deletion of rostral brain.  
964 *Development* **122**, 243–252 (1996).
- 965 25. Skromne, I., Thorsen, D., Hale, M., Prince, V. E. & Ho, R. K. Repression of the hindbrain  
966 developmental program by Cdx factors is required for the specification of the

- 967 vertebrate spinal cord. *Development* **134**, 2147–2158 (2007).
- 968 26. van Rooijen, C. *et al.* Evolutionarily conserved requirement of Cdx for post-occipital  
969 tissue emergence. *Dev.* **139**, 2576–2583 (2012).
- 970 27. Gouti, M. *et al.* A Gene Regulatory Network Balances Neural and Mesoderm  
971 Specification during Vertebrate Trunk Development. *Dev. Cell* **41**, 243-261.e7 (2017).
- 972 28. Wassarman, K. M. *et al.* Specification of the anterior hindbrain and establishment of a  
973 normal mid/hindbrain organizer is dependent on Gbx2 gene function. *Development*  
974 **124**, 2923–2934 (1997).
- 975 29. Denham, M. *et al.* Multipotent caudal neural progenitors derived from human  
976 pluripotent stem cells that give rise to lineages of the central and peripheral nervous  
977 system. *Stem Cells* **33**, 1759–1770 (2015).
- 978 30. Savory, J. G. A. *et al.* Cdx2 regulation of posterior development through non-Hox  
979 targets. *Development* **136**, 4099–4110 (2009).
- 980 31. Lumsden, A. & Krumlauf, R. Patterning the vertebrate neuraxis. [Review] [101 refs].  
981 *Science (80-. ).* **274**, 1109–1115 (1996).
- 982 32. Heimbucher, T. *et al.* Gbx2 and Otx2 Interact with the WD40 Domain of Groucho/Tle  
983 Corepressors. *Mol. Cell. Biol.* **27**, 340–351 (2007).
- 984 33. Davis, C. A. & Joyner, A. L. Expression patterns of the homeo box-containing genes En-  
985 1 and En-2 and the proto-oncogene int-1 diverge during mouse development. *Genes*  
986 *Dev.* **2**, 1736–1744 (1988).
- 987 34. Seitanidou, T., Schneider-Maunoury, S., Desmarquet, C., Wilkinson, D. G. & Charnay,  
988 P. Krox-20 is a key regulator of rhombomere-specific gene expression in the  
989 developing hindbrain. *Mech. Dev.* **65**, 31–42 (1997).
- 990 35. Roy, A. *et al.* Onecut transcription factors act upstream of Isl1 to regulate spinal  
991 motoneuron diversification. *Development* **139**, 3109–3119 (2012).
- 992 36. Delile, J. *et al.* Single cell transcriptomics reveals spatial and temporal dynamics of  
993 gene expression in the developing mouse spinal cord. *Development* **146**, (2019).
- 994 37. Sagner, A. *et al.* Temporal patterning of the central nervous system by a shared  
995 transcription factor code. *bioRxiv* 2020.11.10.376491 (2020)  
996 doi:10.1101/2020.11.10.376491.
- 997 38. Klar, A., Baldassare, M. & Jessell, T. M. F-spondin: A gene expressed at high levels in  
998 the floor plate encodes a secreted protein that promotes neural cell adhesion and

- 999 neurite extension. *Cell* **69**, 95–110 (1992).
- 1000 39. Ma, T., Wong, S. Z. H., Lee, B., Ming, G. Li & Song, H. Decoding neuronal composition  
1001 and ontogeny of individual hypothalamic nuclei. *Neuron* **109**, 1150-1167.e6 (2021).
- 1002 40. Zeisel, A. *et al.* Molecular Architecture of the Mouse Nervous System. *Cell* **174**, 999-  
1003 1014.e22 (2018).
- 1004 41. Febbraro, F., Chen, M. & Denham, M. Generation of Human iPSCs by Episomal  
1005 Reprogramming of Skin Fibroblasts and Peripheral Blood Mononuclear Cells. in 135–  
1006 151 (2021). doi:10.1007/978-1-0716-1084-8\_9.
- 1007 42. Kabadi, A. M., Ousterout, D. G., Hilton, I. B. & Gersbach, C. A. Multiplex CRISPR/Cas9-  
1008 based genome engineering from a single lentiviral vector. *Nucleic Acids Res.* **42**,  
1009 (2014).
- 1010 43. Gill, K. P. & Denham, M. Optimized Transgene Delivery Using Third-Generation  
1011 Lentiviruses. *Curr. Protoc. Mol. Biol.* **133**, 1–21 (2020).
- 1012 44. Lunde, A. & Glover, J. C. A versatile toolbox for semi-automatic cell-by-cell object-  
1013 based colocalization analysis. *Sci. Rep.* **10**, 19027 (2020).
- 1014 45. Kim, D., Langmead, B. & Salzberg, S. L. HISAT: a fast spliced aligner with low memory  
1015 requirements. *Nat. Methods* **12**, 357–360 (2015).
- 1016 46. Liao, Y., Smyth, G. K. & Shi, W. featureCounts: an efficient general purpose program  
1017 for assigning sequence reads to genomic features. *Bioinformatics* **30**, 923–930 (2014).
- 1018 47. McCarthy, D. J., Chen, Y. & Smyth, G. K. Differential expression analysis of multifactor  
1019 RNA-Seq experiments with respect to biological variation. *Nucleic Acids Res.* **40**, 4288–  
1020 4297 (2012).
- 1021 48. Metsalu, T. & Vilo, J. ClustVis: a web tool for visualizing clustering of multivariate data  
1022 using Principal Component Analysis and heatmap. *Nucleic Acids Res.* **43**, W566–W570  
1023 (2015).
- 1024 49. Tentillier, N. *et al.* Anti-Inflammatory Modulation of Microglia via CD163-Targeted  
1025 Glucocorticoids Protects Dopaminergic Neurons in the 6-OHDA Parkinson’s Disease  
1026 Model. *J. Neurosci.* **36**, 9375–9390 (2016).
- 1027 50. Björklund, A. & Dunnett, S. B. The Amphetamine Induced Rotation Test: A Re-  
1028 Assessment of Its Use as a Tool to Monitor Motor Impairment and Functional  
1029 Recovery in Rodent Models of Parkinson’s Disease. *J. Parkinsons. Dis.* **9**, 17–29 (2019).
- 1030 51. Schallert, T., Fleming, S. M., Leasure, J. L., Tillerson, J. L. & Bland, S. T. CNS plasticity

- 1031 and assessment of forelimb sensorimotor outcome in unilateral rat models of stroke,  
1032 cortical ablation, parkinsonism and spinal cord injury. *Neuropharmacology* **39**, 777–  
1033 787 (2000).
- 1034 52. Bankhead, P. *et al.* QuPath: Open source software for digital pathology image analysis.  
1035 *Sci. Rep.* **7**, 16878 (2017).
- 1036 53. Abercrombie, M. Estimation of nuclear population from microtome sections. *Anat.*  
1037 *Rec.* **94**, 239–247 (1946).
- 1038

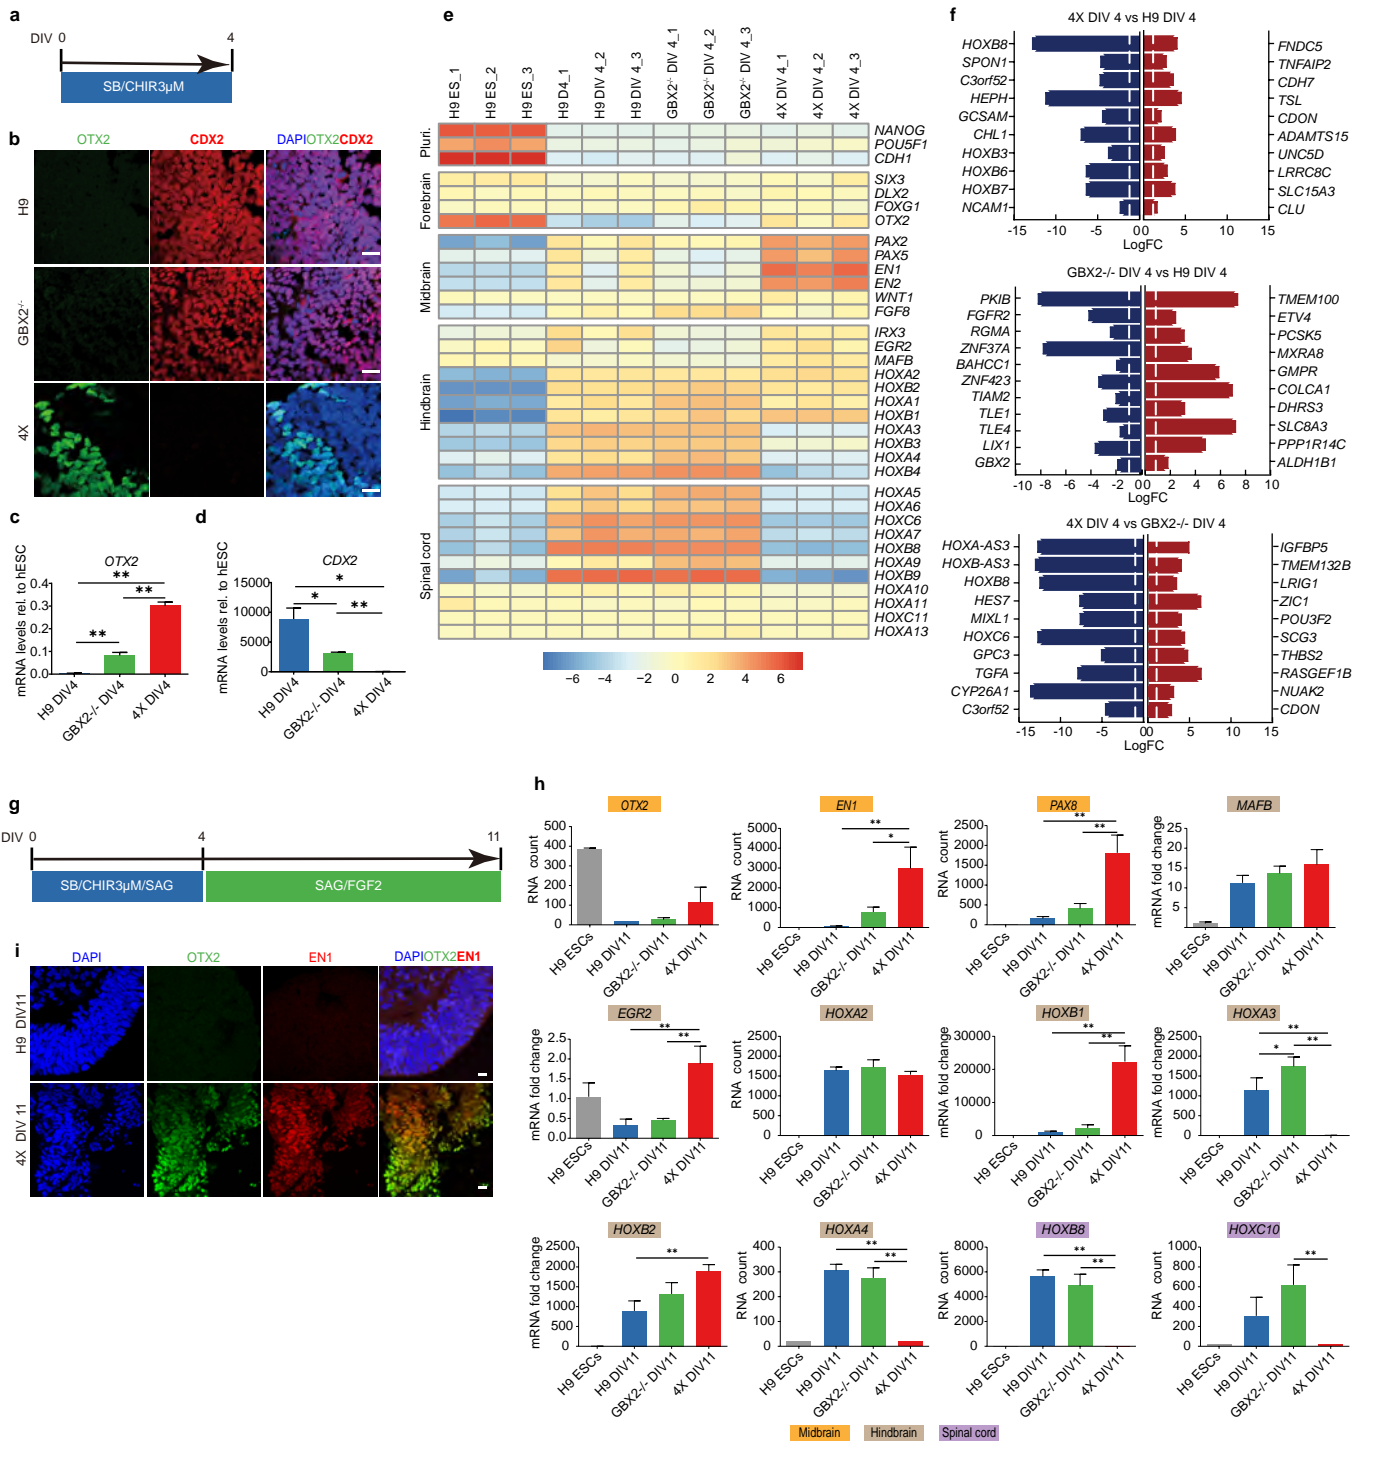

**Figure 1: Differentiation of GBX2<sup>+</sup> and 4X cells into CNPs.**

**a**, Schematic diagram of the 4 DIV CNP differentiation protocol.

**b**, Representative immunostaining images of H9 and GBX2<sup>+</sup> CNPs at 4 DIV showing OTX2/CDX2<sup>+</sup> cells. A few 4X CNPs were positive for OTX2, but no cells were positive for CDX2. Scale bars, 20  $\mu$ m.

**c-d**, qPCR analysis of OTX2 (**c**) and CDX2 (**d**) expression in H9, GBX2<sup>+</sup> and 4X CNPs at 4 DIV. The data are presented as the mean  $\pm$  SD; n = 3. One-way ANOVA showed statistical significance, and then an unpaired t-test comparing two groups was performed. \*P < 0.05; \*\*P < 0.01.

**e**, Heatmap of the expression of pluripotent and neural genes representing the anterior, midbrain, hindbrain and spinal cord regions in H9, GBX2<sup>+</sup> and 4X CNPs at 4 DIV.

**f**, The top 10 downregulated (blue) and upregulated (red) genes (and additional selected genes in bold) between cultured 4X and H9 cells, cultured GBX2<sup>+</sup> and H9 cells and cultured 4X and GBX2<sup>+</sup> cells at 4 DIV. The threshold bar (white line) indicates a fold change of  $\pm$ 2.

**g**, Schematic diagram of the 11 DIV CNP differentiation protocol.

**h**, RNA expression analysis of the midbrain genes (orange) OTX2, EN1 and PAX8; the hindbrain genes (gray) MAFB, EGR2, HOXA2, HOXB1, HOXA3, HOXB2, and HOXA4; and the spinal cord genes (purple) HOXB8 and HOXC10. The data are presented as the mean  $\pm$  SD; n = 3. One-way ANOVA followed by Tukey's multiple comparisons test. \*P < 0.05; \*\*P < 0.01.

**i**, Representative immunohistochemical analysis of OTX2/EN1 double-positive cells among 11 DIV 4X cells. No OTX2/EN1 double-positive cells were detected among H9 cells. Scale bars, 10  $\mu$ m. For (b) and (i), DAPI was used as a nuclear stain. Caudal neural progenitor: CNP.



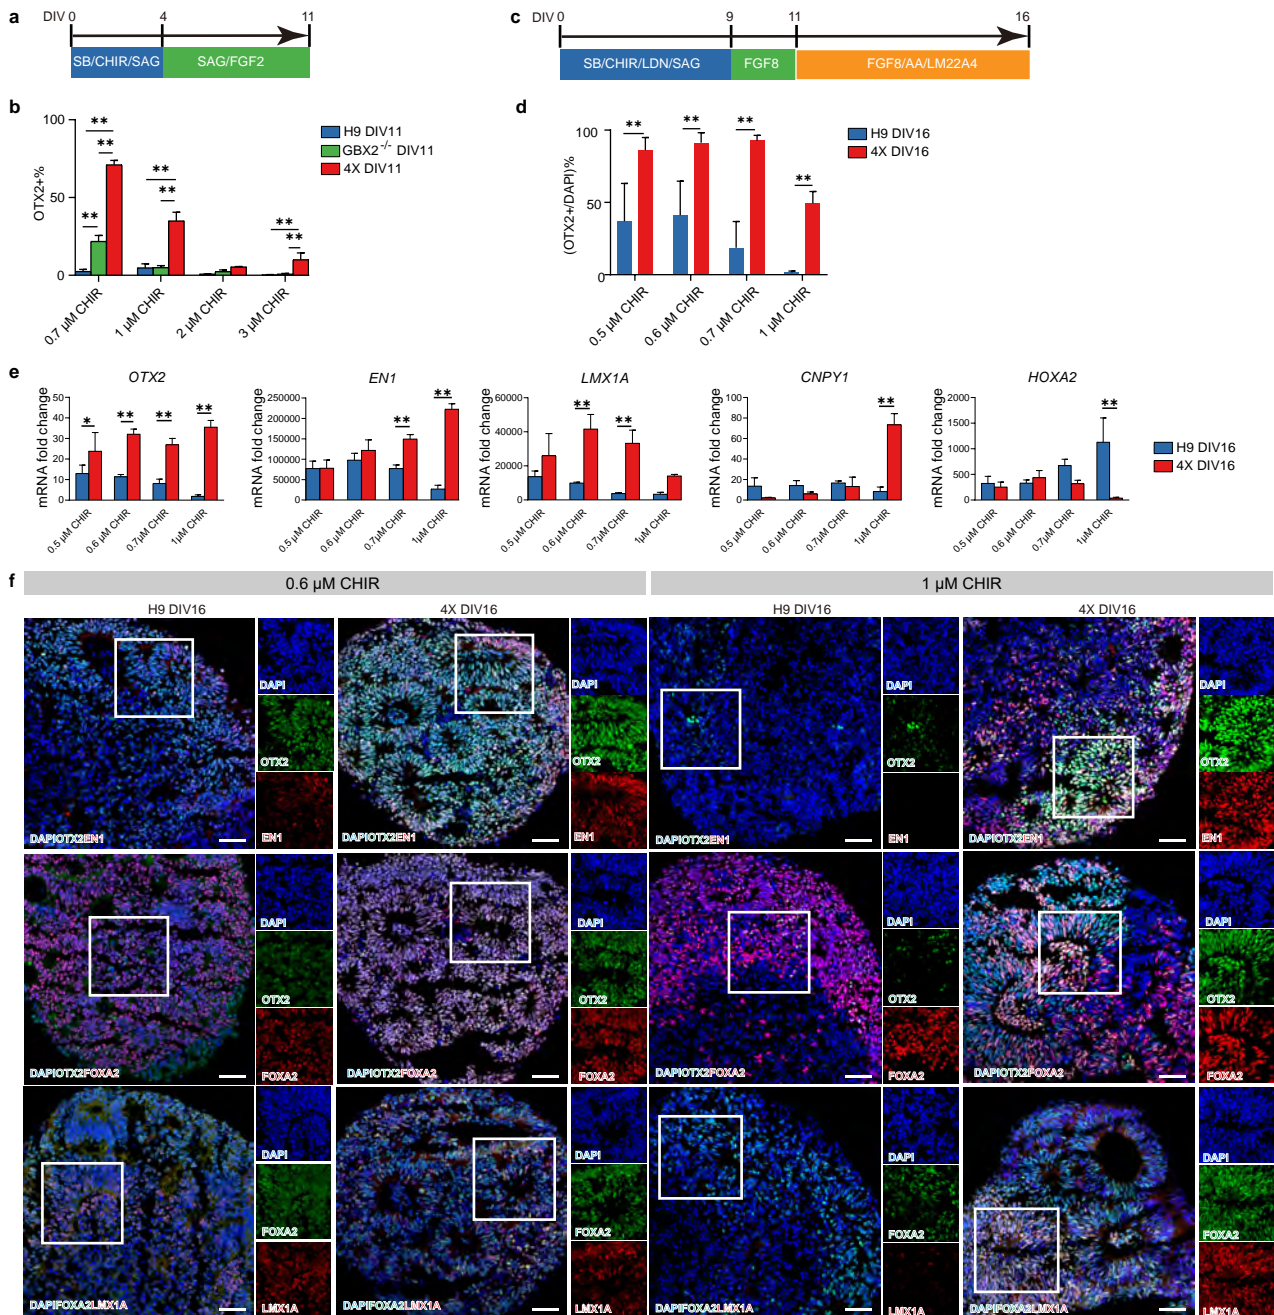

**Figure 2: Differentiation into ventral midbrain progenitors.**

**a**, Schematic diagram of the 11 DIV CNP differentiation protocol using different concentrations of GSK3i ranging from 0.7 μM to 3 μM.

**b**, Flow cytometry analysis of the percentage of OTX2-positive cells among H9, GBX2<sup>-/-</sup> and 4X CNPs at 11 DIV. The data are presented as the mean ± SD; n = 3. Two-way ANOVA followed by Tukey's multiple comparisons test comparing groups treated with the same concentration of GSK3i. \*\*P < 0.01.

**c**, Schematic diagram of the 16 DIV caudal midbrain differentiation protocol using different concentrations of GSK3i ranging from 0.5 μM to 1 μM.

**d**, Quantification of OTX2-positive cells among H9 and 4X cells at 16 DIV after administration of GSK3i at concentrations ranging from 0.5 μM to 1 μM. The data are presented as the mean ± SD; n = 4-8. Two-way ANOVA followed by Sidak's multiple comparisons test comparing groups treated with the same concentration of GSK3i. \*\*P < 0.01.

**e**, Expression of *OTX2*, *EN1*, *LMX1A*, *CNPY1*, and *HOXA2* in H9 and 4X cells treated with a range of GSK3i concentrations at 16 DIV. The data are presented as the mean ± SD, n = 3. Two-way ANOVA followed by Sidak's multiple comparisons test comparing groups treated with the same concentration of GSK3i. \*P < 0.05; \*\*P < 0.01.

**f**, Representative immunohistochemical analysis of OTX2, EN1, FOXA2, and LMX1A expression in H9 and 4X cells treated with GSK3i at concentrations of 0.6 μM and 1 μM on 16 DIV. DAPI was used as a nuclear stain. Scale bars, 50 μm. Caudal neural progenitor: CNP.

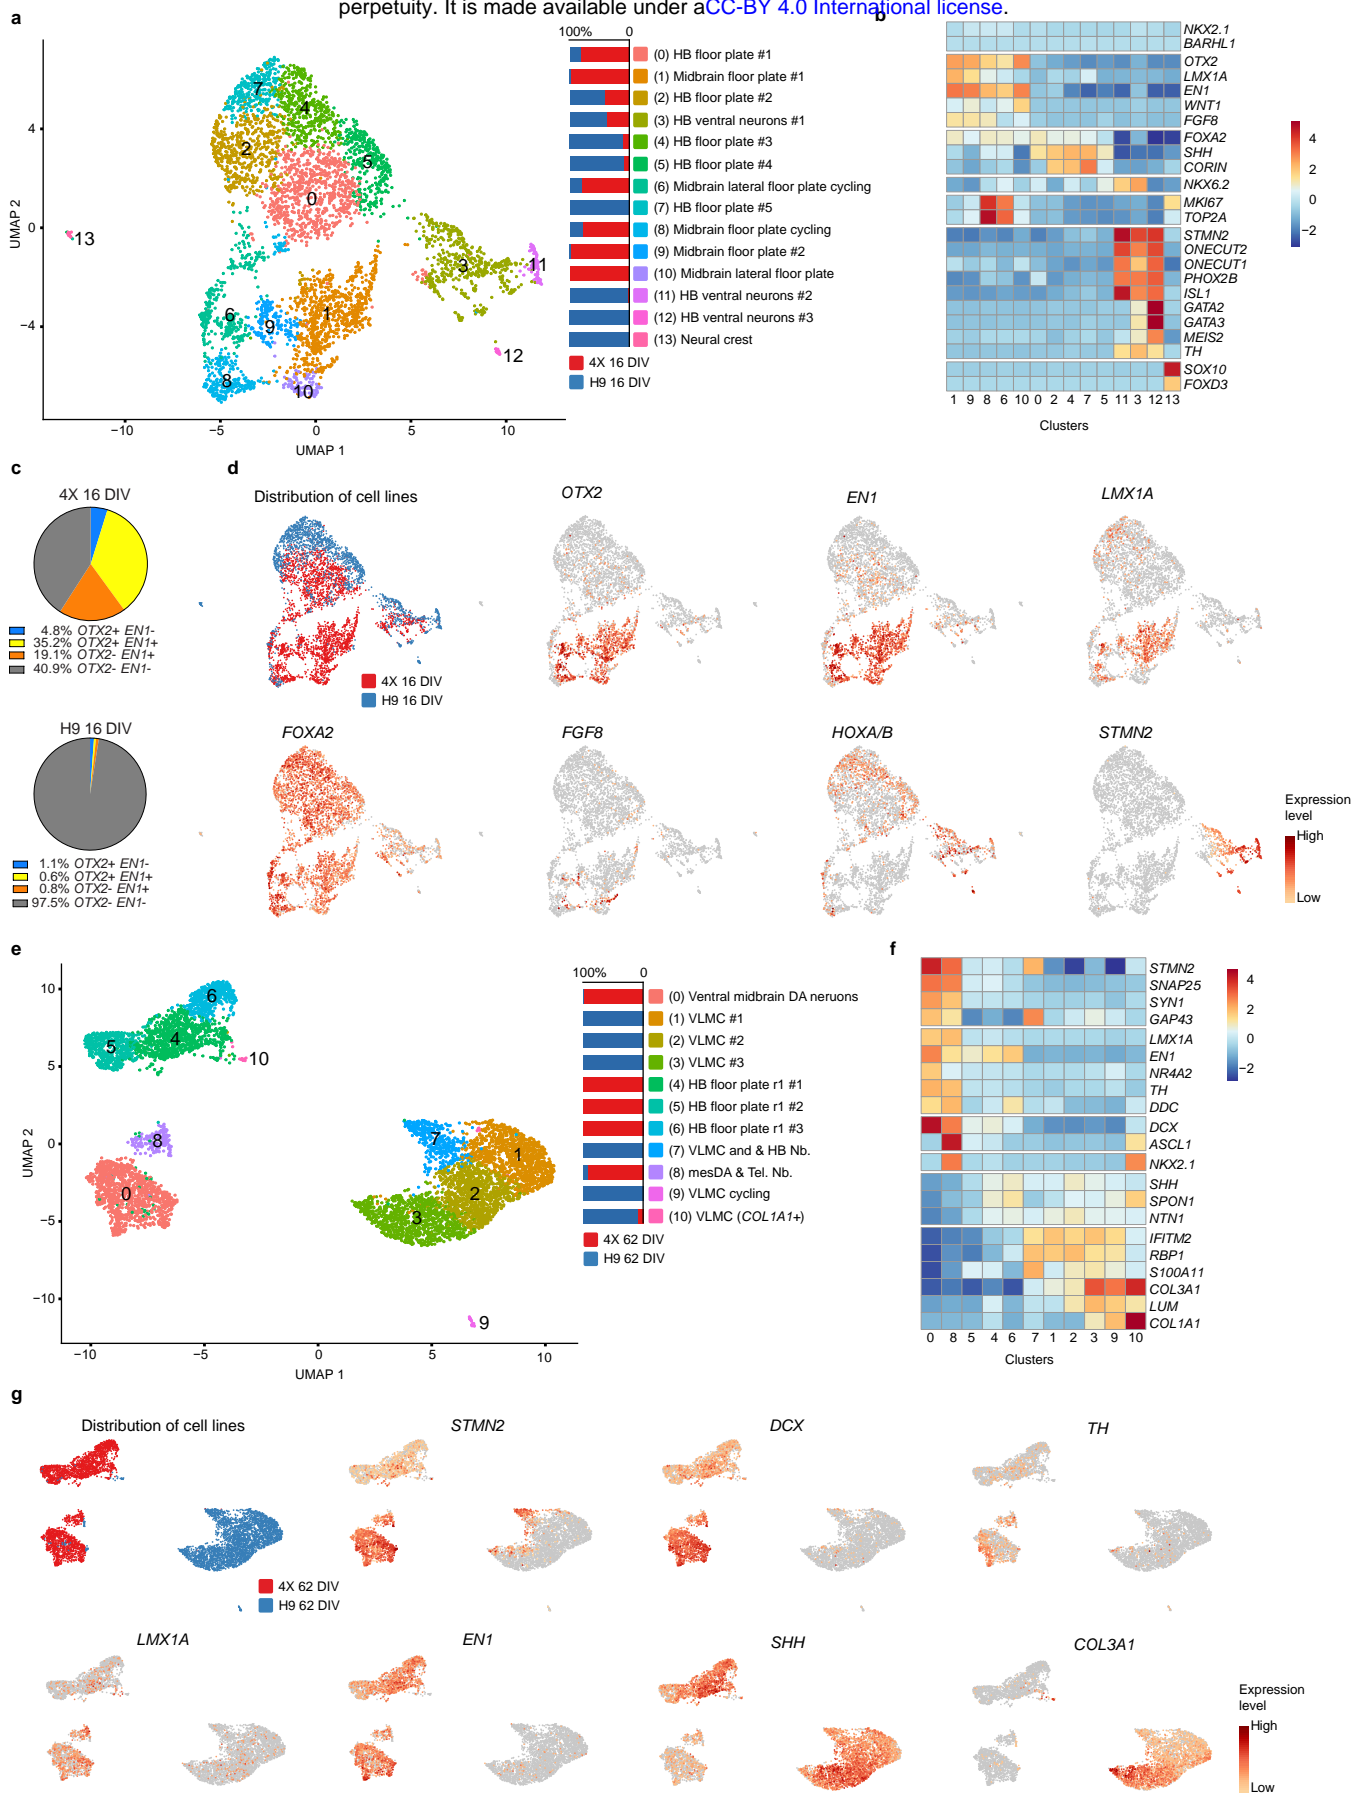

**Figure 3: Single-cell sequencing of midbrain neurons differentiated using 1  $\mu$ M GSK3i at 16 and 62 DIV.**

**a.** UMAP of cultured 4X and H9 cells at 16 DIV and a graph of the percentage of cells that each cell line contributed to each cluster ( $n = 10$  4X cell spheres;  $n = 10$  H9 cell spheres; total of 4,682 cells).

**b.** Heatmap of the expression of selected genes illustrating the identity of the clusters.

**c.** Percentage of 4X and H9 cells expressing OTX2 and EN1.

**d.** Feature plot of the contribution of each cell line to each cluster and feature plot of gene expression levels of OTX2, EN1, LMX1A, FOXA2, FGF8, HOXA/B family members and STMN2.

**e.** UMAP of cultured 4X and H9 cells at 62 DIV and a graph of the percentage of cells that each cell line contributed to each cluster ( $n = 4$  4X cell cultures;  $n = 4$  H9 cell cultures; total of 6,804 cells).

**f.** Heatmap of the expression of selected genes illustrating the identity of the clusters.

**g.** Feature plot of the contribution of each cell line to each cluster and feature plot of the gene expression levels of STMN2, DCX, TH, LMX1A, EN1, SHH and COL3A1.

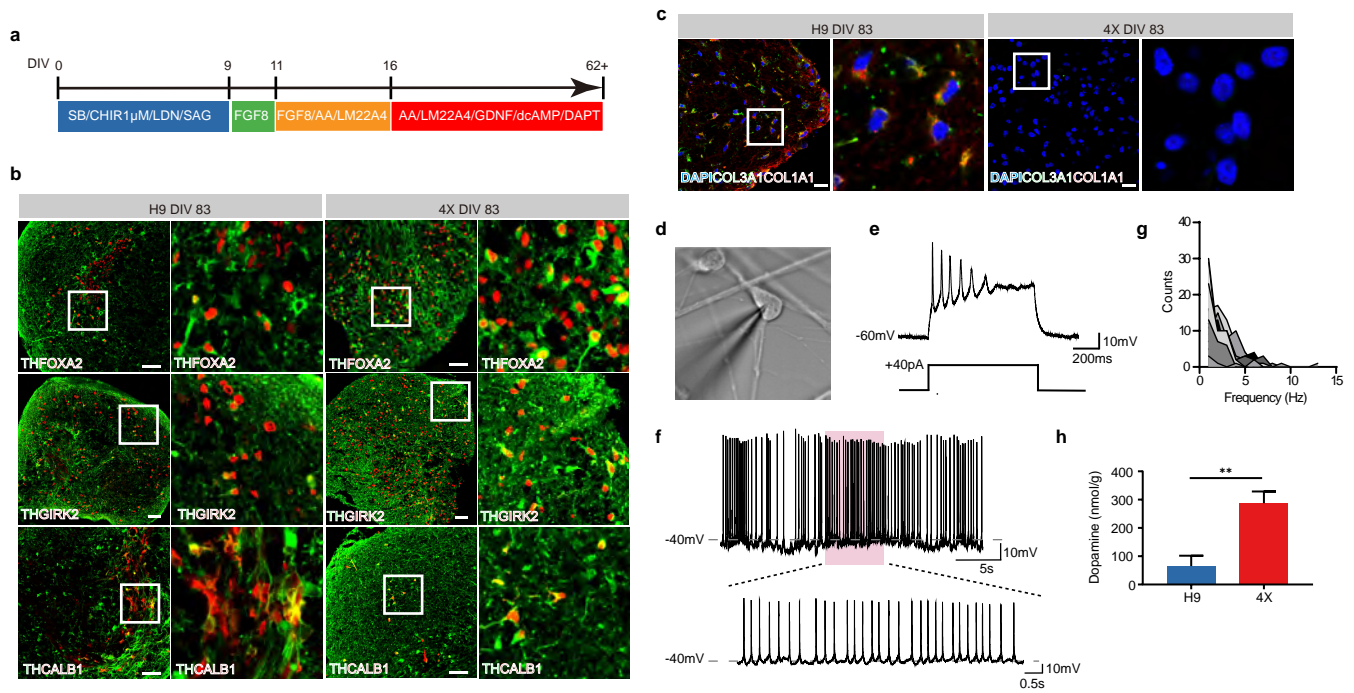

**Figure 4: Generation of functional ventral midbrain DA neurons in vitro.**

**a**, Schematic diagram of the long-term (62 DIV) neuronal differentiation protocol.

**b**, Representative immunohistochemical images of TH/FOXA2, TH/GIRK2, and TH/CALB1 costaining in H9 and 4X cells treated with 1  $\mu$ M GSK3i on 83 DIV. Scale bars, 50  $\mu$ m.

**c**, Representative immunohistochemical analysis of COL3A1 and COL1A1 expression. Many H9 cells were double positive for COL3A1 and COL1A1, but no 4X cells were positive for COL3A1 or COL1A1. DAPI was used as a nuclear stain. Scale bars, 20  $\mu$ m.

**d**, Phase contrast image of a patched 4X neuron during whole-cell recording. Scale bar, 10  $\mu$ m.

**e**, Representative response (top trace) to a depolarizing current injection (bottom trace) showing firing of repetitive action potentials.

**f**, Example of spontaneous firing at a resting membrane potential of -45 mV showing burst-like events. Overshooting spikes occurred in groups interspersed by periods of subthreshold membrane oscillation.

**g**, Frequency distribution of spontaneous cell firing showing firing frequencies ranging between 1 and 5 Hz ( $n = 16$  cells).

**h**, Dopamine content (normalized to the protein concentration) in 4X and H9 cells at 79 DIV, as measured by HPLC. The data are presented as the mean  $\pm$  SD;  $n = 3$ . An unpaired t-test was used to compare groups. \*\* $P < 0.01$ .



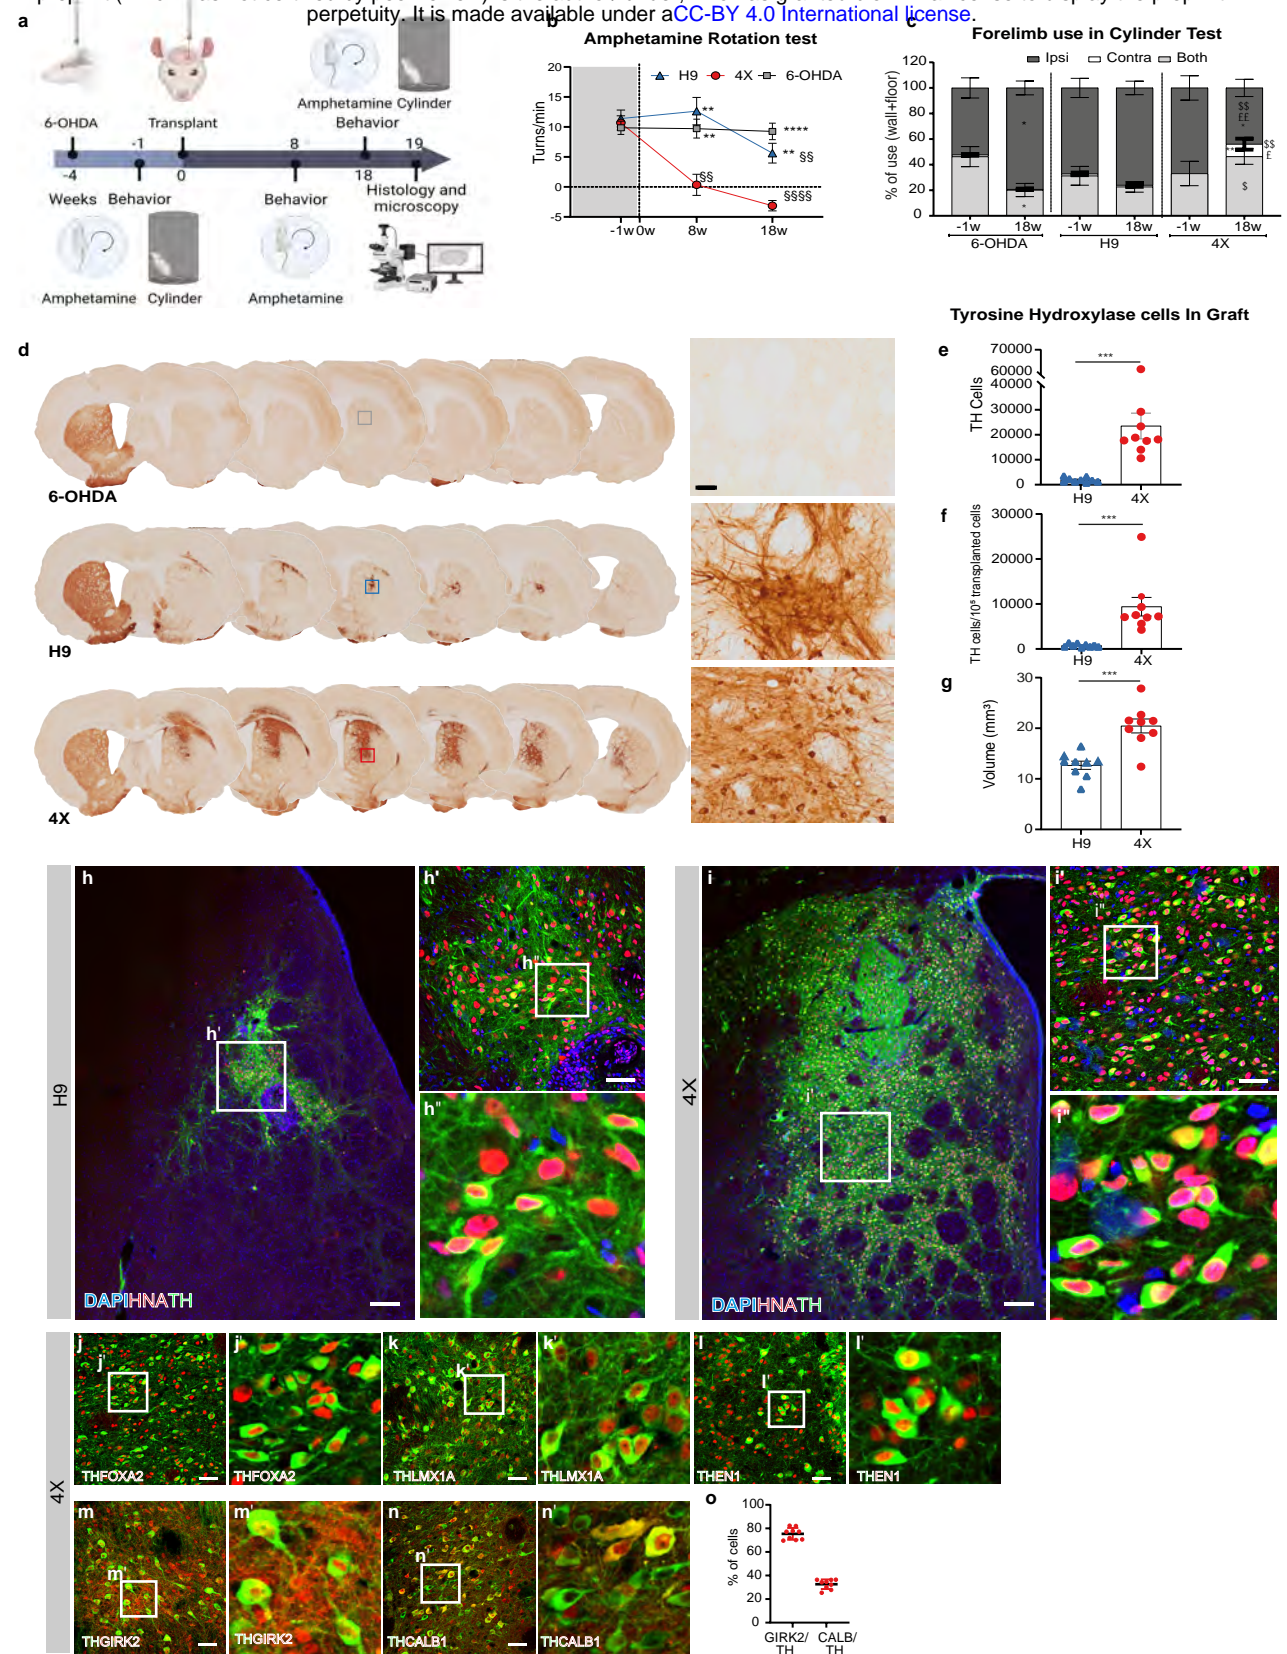

**Figure 5: In vivo analysis of cells transplanted into a Parkinson's disease rat model.**

**a**, Overview of the in vivo study. Unilateral 6-OHDA-induced MFB lesions were generated (week -4) and confirmed 3 weeks later by the cylinder and amphetamine-induced rotation tests. The animals were subdivided into 3 groups with similar average scores on the rotation test. Four weeks after lesioning (week 0), two of these subgroups were transplanted with 250,000 cells (H9 or 4X cells), and the third group did not undergo transplantation (6-OHDA lesion group). The rotation test was repeated at weeks 8 and 18 posttransplant, and the cylinder test was repeated at week 18. The animals were killed at week 19 posttransplantation (23 week after lesioning) for histological analysis.

**b**, Amphetamine-induced rotational asymmetry. Two-way repeated measures ANOVA followed by Sidak's multiple comparison test; time:  $F(1.689, 35.46) = 19.50, P < 0.0001$ ; treatment:  $F(2, 21) = 15.23 P < 0.0001$ . \*\*  $P < 0.01$  and \*\*\*\*  $P < 0.0001$  vs. the 4X cell-transplanted group at the same time point. §§  $P < 0.01$  and §§§§  $P < 0.0001$  vs. the same group at week -1.

**c**, The use of each forelimb (contra or ipsi) and both forelimbs in the cylinder test was analyzed by two-way repeated measures ANOVA followed by Sidak's multiple comparison test with time and group as variables. Time x group: both:  $F(2, 22) = 5.785, P = 0.009$ ; ipsi:  $F(2, 22) = 8.800, P = 0.001$ ; contra:  $F(2, 22) = 4.642, P = 0.021$ . \*  $P < 0.05$  and \*\*  $P < 0.01$  vs. the same group at -1 week. \$  $P < 0.05$  and \$\$  $P < 0.01$  vs. the 6-OHDA lesion group at the same time point. £  $P < 0.05$  and ££  $P < 0.01$  vs. the H9 cell-transplanted group at the same time point. The data in (b) and (c) are presented as the mean  $\pm$  SEM.  $n = 7$  rats in the 6-OHDA lesion group,  $n = 9$  rats in the 4X cell-transplanted group, and  $n = 8$  rats in the H9 cell-transplanted group.

**d**, Representative photos of coronal sections from all three groups immunostained for TH. Higher magnification images of the areas in the frame are shown on the right. Scale bars, 50  $\mu$ m for all three photos in the column. The graphs on the right show (e) the estimated numbers of TH-positive cells in the grafts, (f) the yield of TH-positive neurons per 100,000 grafted cells and (g) the volume of the TH-positive graft (see Methods for details).

**h-i**, Representative photomicrographs showing THA-positive and TH-positive cells within H9 cell (h) and 4X cell (i) grafts. The squares in h-i and h'-i' indicate the magnified areas shown in h'-i'' and h''-i'', respectively. DAPI was used as a nuclear stain. Scale bars, 200  $\mu$ m (h-i) and 50  $\mu$ m (h'-i').

**j-n**, Representative immunofluorescence images of cells double-positive for TH/FOXA2 (j), TH/LMX1A (k), TH/EN1 (l), TH/GIRK2 (m) and TH/CALB1 (n) within 4X cell grafts. (j'-n') High-power images of j-n highlighting the graft composition. Scale bar, 50  $\mu$ m.

**o**, Quantitative analysis of the immunofluorescence data in m and n, showing the percentages of GIRK2/TH and CALB1/TH double-positive cells within 4X cell grafts. The data are presented as the mean percentage  $\pm$  SD ( $n = 9$  rats).
